# Supplementary material for: Asymmetric connectivity of spawning aggregations of a commercially important marine fish using a multidisciplinary approach
Source: PubMed Central journal article supplement (PMC4137664; doi:10.7717/peerj.511), 2014-08-07
Supplement: peerj-02-511-s008.pdf [file peerj-02-511-s008.pdf]

# Example: sequence data set wit two loci [simula

MIGRATION RATE AND POPULATION SIZE ESTIMATION  
 using the coalescent and maximum likelihood or Bayesian inference  
 Migrate-n version 3.2.6 [1776]  
 Program started at Thu Jan 31 09:22:07 2013  
 Program finished at Fri Feb 1 03:31:42 2013

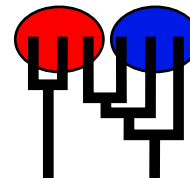

## Options

Datatype: DNA sequence data

Inheritance scalers in use for Thetas: 1.00  
 [Each Theta uses the (true) ineritance scalar of the first locus as a reference]

Random number seed: (with internal timer) 940661911

Start parameters:

Theta values were generated from the FST-calculation

M values were generated from the FST-calculation

Connection type matrix:  
 where m = average (average over a group of Thetas or M,  
 s = symmetric M, S = symmetric 4Nm, 0 = zero, and not estimated,  
 \* = free to vary, Thetas are on diagonal

| Population | 1 | 2 | 3 |
|------------|---|---|---|
| 1 BAJA     | * | * | * |
| 2 MIDR     | * | * | * |
| 3 MAIN     | * | * | * |

Order of parameters:

- 1  $\Theta_1$  <displayed>
- 2  $\Theta_2$  <displayed>
- 3  $\Theta_3$  <displayed>
- 4  $M_{2 \rightarrow 1}$  <displayed>
- 5  $M_{3 \rightarrow 1}$  <displayed>
- 6  $M_{1 \rightarrow 2}$  <displayed>

|   |   |      |             |
|---|---|------|-------------|
| 7 | M | 3->2 | <displayed> |
| 8 | M | 1->3 | <displayed> |
| 9 | M | 2->3 | <displayed> |

Mutation rate among loci: Mutation rate is constant

Analysis strategy: Bayesian inference

Proposal distributions for parameter

| Parameter | Proposal       |
|-----------|----------------|
| Theta     | Slice sampling |
| M         | Slice sampling |

Prior distribution for parameter

| Parameter | Prior   | Minimum  | Mean*        | Maximum      | Delta       | Bins |
|-----------|---------|----------|--------------|--------------|-------------|------|
| Theta     | Uniform | 0.000000 | 50.000000    | 100.000000   | 10.000000   | 1500 |
| M         | Uniform | 0.000000 | 37500.000000 | 75000.000000 | 7500.000000 | 1500 |

Markov chain settings: Long chain

|                                              |         |
|----------------------------------------------|---------|
| Number of chains                             | 1       |
| Recorded steps [a]                           | 50000   |
| Increment (record every x step [b])          | 100     |
| Number of concurrent chains (replicates) [c] | 1       |
| Visited (sampled) parameter values [a*b*c]   | 5000000 |
| Number of discard trees per chain (burn-in)  | 2500000 |

Multiple Markov chains:

|                        |                             |      |      |      |      |      |      |      |      |      |
|------------------------|-----------------------------|------|------|------|------|------|------|------|------|------|
| Static heating scheme  | 20 chains with temperatures |      |      |      |      |      |      |      |      |      |
| 2.40                   | 2.10                        | 2.00 | 1.95 | 1.80 | 1.65 | 1.50 | 1.40 | 1.25 | 1.10 | 1.00 |
| Swapping interval is 1 |                             |      |      |      |      |      |      |      |      |      |

Print options:

|                                                   |                       |
|---------------------------------------------------|-----------------------|
| Data file:                                        | MRO_NGulf_direct.seq  |
| Output file:                                      | MRO_NGulf_subset_run1 |
| Posterior distribution raw histogram file:        | bayesfile             |
| Print data:                                       | No                    |
| Print genealogies [only some for some data type]: | None                  |

## *Data summary*

Datatype: Sequence data

Number of loci: 1

| Population               | Locus | Gene copies |
|--------------------------|-------|-------------|
| 1 BAJA                   | 1     | 30          |
| 2 MIDR                   | 1     | 30          |
| 3 MAIN                   | 1     | 30          |
| Total of all populations | 1     | 90          |

## *Bayesian Analysis: Posterior distribution table*

| Locus | Parameter             | 2.5%    | 25.0%    | Mode     | 75.0%    | 97.5%    | Median   | Mean     |
|-------|-----------------------|---------|----------|----------|----------|----------|----------|----------|
| 1     | $\Theta_1$            | 0.00000 | 0.00000  | 0.03333  | 13.33333 | 72.93333 | 46.83333 | 48.74249 |
| 1     | $\Theta_2$            | 0.00000 | 0.00000  | 0.03333  | 0.53333  | 1.40000  | 0.56667  | 0.10249  |
| 1     | $\Theta_3$            | 1.86667 | 22.00000 | 27.10000 | 32.20000 | 95.40000 | 49.83333 | 49.94295 |
| 1     | $M_{2 \rightarrow 1}$ | 38700.0 | 44850.0  | 47125.0  | 51000.0  | 75000.0  | 53375.0  | 51785.6  |
| 1     | $M_{3 \rightarrow 1}$ | 35650.0 | 45800.0  | 53875.0  | 56700.0  | 69950.0  | 51225.0  | 48963.4  |
| 1     | $M_{1 \rightarrow 2}$ | 12600.0 | 24050.0  | 27975.0  | 30500.0  | 40100.0  | 25725.0  | 24033.5  |
| 1     | $M_{3 \rightarrow 2}$ | 7250.0  | 23150.0  | 27325.0  | 30100.0  | 32000.0  | 24375.0  | 22001.7  |
| 1     | $M_{1 \rightarrow 3}$ | 37550.0 | 51800.0  | 56475.0  | 62050.0  | 75000.0  | 56775.0  | 54603.6  |
| 1     | $M_{2 \rightarrow 3}$ | 39000.0 | 57850.0  | 64525.0  | 69000.0  | 75000.0  | 61275.0  | 58195.6  |

*Bayesian Analysis: Posterior distribution over all loci*

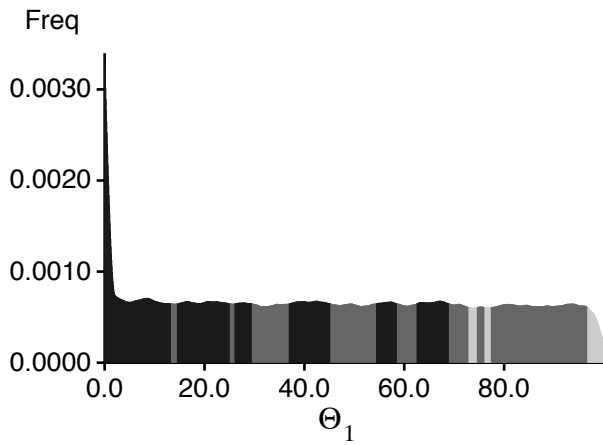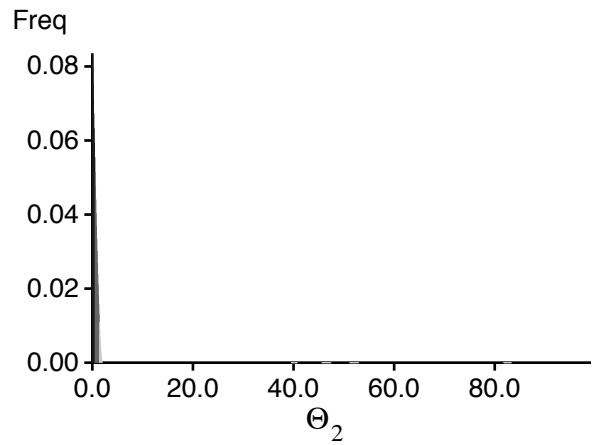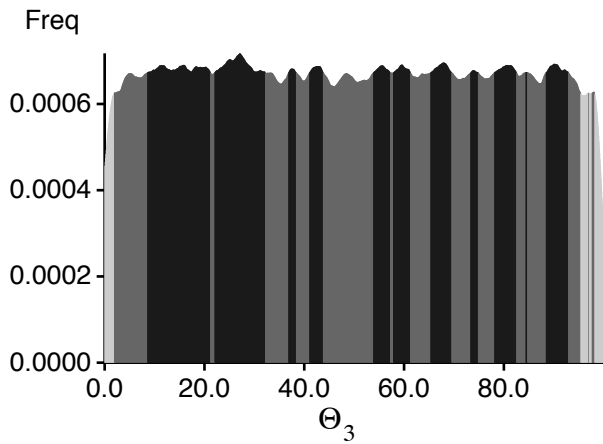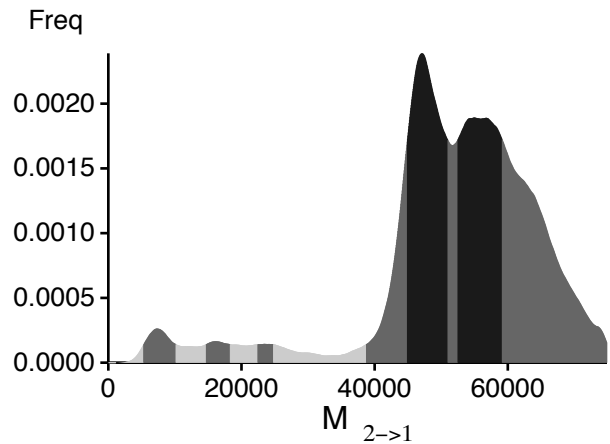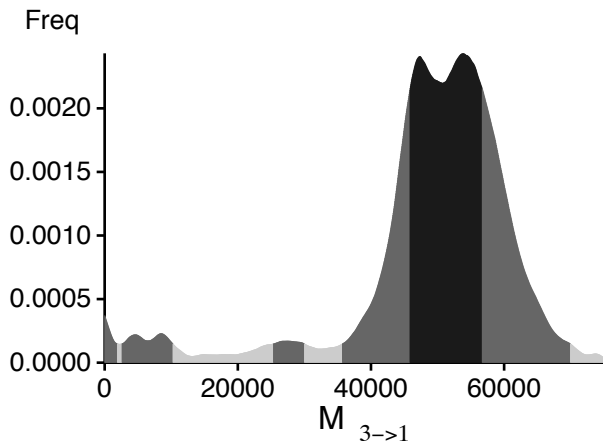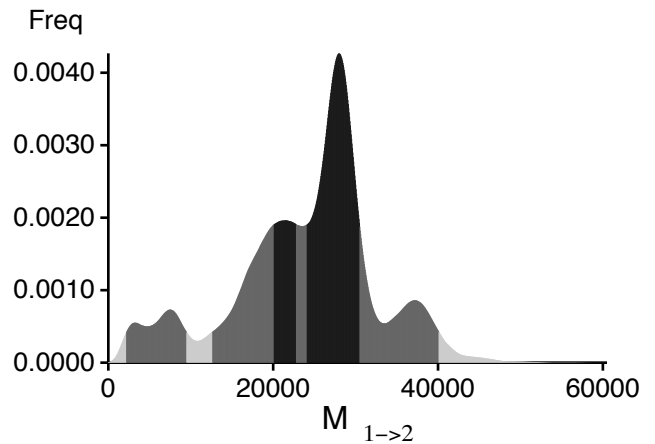

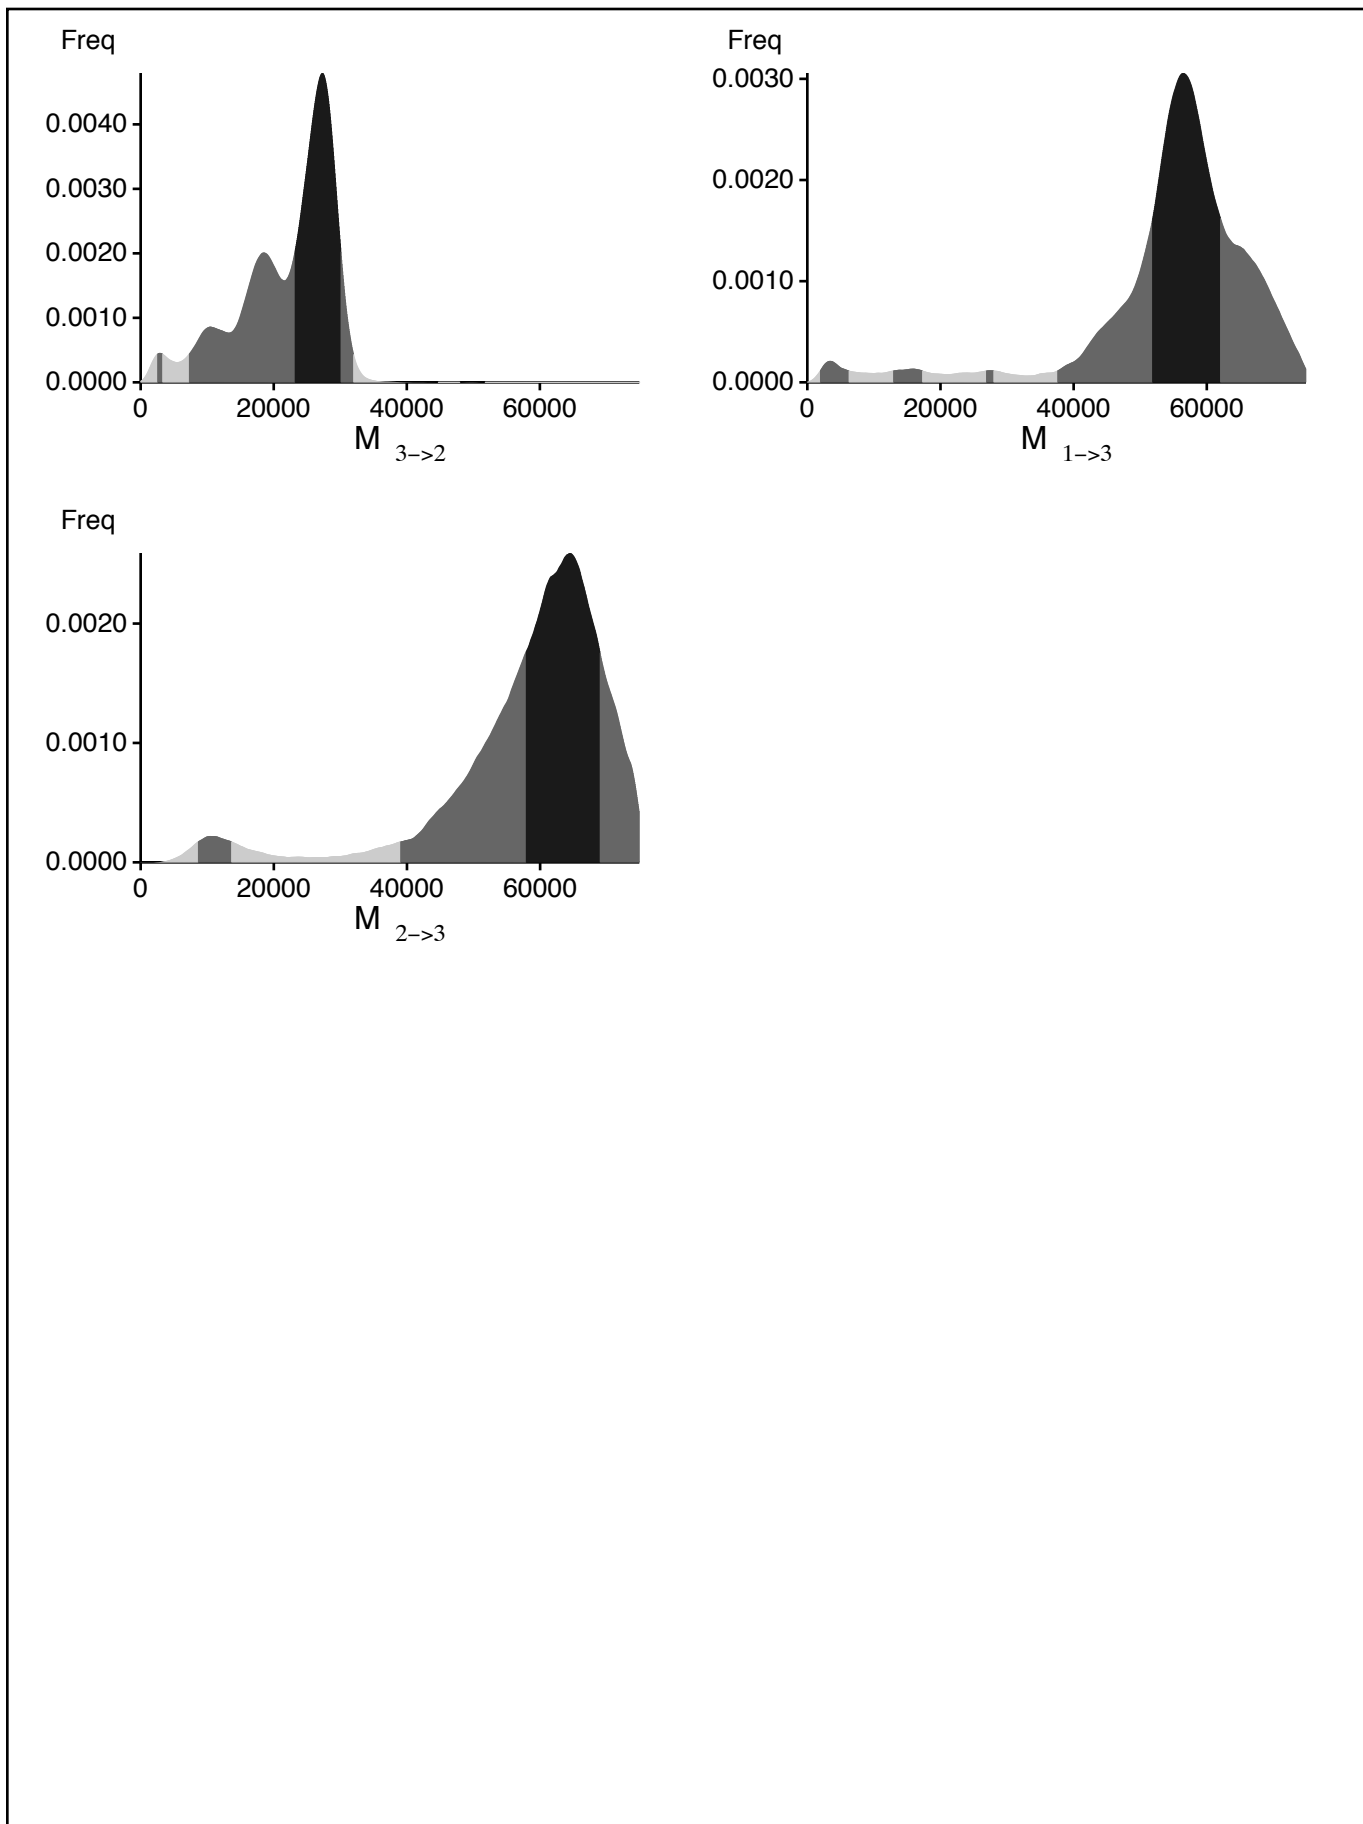

## *Log-Probability of the data given the model (marginal likelihood)*

Use this value for Bayes factor calculations:

$BF = \text{Exp}[\ln(\text{Prob}(D | \text{thisModel})) - \ln(\text{Prob}(D | \text{otherModel}))]$

or as  $LBF = 2 (\ln(\text{Prob}(D | \text{thisModel})) - \ln(\text{Prob}(D | \text{otherModel})))$

shows the support for thisModel]

| Method                    | $\ln(\text{Prob}(D   \text{Model}))$ | Notes |
|---------------------------|--------------------------------------|-------|
| Thermodynamic integration | -2673.945007                         | (1a)  |
|                           | -2673.201840                         | (1b)  |
| Harmonic mean             | -2514.327699                         | (2)   |

(1a, 1b and 2) is an approximation to the marginal likelihood, make sure the program run long enough!

(1a, 1b) and (2) should give a similar result, (2) is considered more

crude than (1), but (1) needs heating with several well-spaced chains,

(1b) is using a Bezier-curve to get better approximations for runs with low number

of heated chains

*Acceptance ratios for all parameters and the genealogies*

| Parameter        | Accepted changes | Ratio   |
|------------------|------------------|---------|
| $\Theta_1$       | 417266/417266    | 1.00000 |
| $\Theta_2$       | 416414/416414    | 1.00000 |
| $\Theta_3$       | 416618/416618    | 1.00000 |
| M <sub>2→1</sub> | 417300/417300    | 1.00000 |
| M <sub>3→1</sub> | 417026/417026    | 1.00000 |
| M <sub>1→2</sub> | 415846/415846    | 1.00000 |
| M <sub>3→2</sub> | 416676/416676    | 1.00000 |
| M <sub>1→3</sub> | 416627/416627    | 1.00000 |
| M <sub>2→3</sub> | 416463/416463    | 1.00000 |
| Genealogies      | 269581/2500493   | 0.10781 |



## *MCMC-Autocorrelation and Effective MCMC Sample Size*

| Parameter             | Autocorrelation | Effective Sample Size |
|-----------------------|-----------------|-----------------------|
| $\Theta_1$            | 0.03325         | 46781.90              |
| $\Theta_2$            | 0.75541         | 6966.74               |
| $\Theta_3$            | 0.00608         | 49395.76              |
| $M_{2 \rightarrow 1}$ | 0.88258         | 3118.69               |
| $M_{3 \rightarrow 1}$ | 0.85248         | 3981.64               |
| $M_{1 \rightarrow 2}$ | 0.87851         | 3233.77               |
| $M_{3 \rightarrow 2}$ | 0.92880         | 1845.61               |
| $M_{1 \rightarrow 3}$ | 0.89045         | 2897.43               |
| $M_{2 \rightarrow 3}$ | 0.88126         | 3155.82               |
| Ln[Prob(DIG)]         | 0.56377         | 13947.82              |

## *Warnings*

You should most likely rerun your analysis after improving run parameters.

Param 9 (Locus 1): Upper prior boundary seems too low!

# Example: sequence data set wit two loci [simula

MIGRATION RATE AND POPULATION SIZE ESTIMATION  
 using the coalescent and maximum likelihood or Bayesian inference  
 Migrate-n version 3.2.6 [1776]  
 Program started at Fri Feb 1 09:03:25 2013  
 Program finished at Sat Feb 2 03:12:08 2013



## Options

Datatype: DNA sequence data

Inheritance scalers in use for Thetas: 1.00

[Each Theta uses the (true) ineritance scalar of the first locus as a reference]

Random number seed: (with internal timer) 1457695717

Start parameters:

Theta values were generated from the FST-calculation

M values were generated from the FST-calculation

Connection type matrix:

where m = average (average over a group of Thetas or M,  
 s = symmetric M, S = symmetric 4Nm, 0 = zero, and not estimated,  
 \* = free to vary, Thetas are on diagonal

| Population | 1 | 2 | 3 |
|------------|---|---|---|
| 1 BAJA     | * | * | * |
| 2 MIDR     | * | * | * |
| 3 MAIN     | * | * | * |

Order of parameters:

|   |                      |             |
|---|----------------------|-------------|
| 1 | $\Theta_1$           | <displayed> |
| 2 | $\Theta_2$           | <displayed> |
| 3 | $\Theta_3$           | <displayed> |
| 4 | M <sub>2-&gt;1</sub> | <displayed> |
| 5 | M <sub>3-&gt;1</sub> | <displayed> |
| 6 | M <sub>1-&gt;2</sub> | <displayed> |

|   |   |      |             |
|---|---|------|-------------|
| 7 | M | 3->2 | <displayed> |
| 8 | M | 1->3 | <displayed> |
| 9 | M | 2->3 | <displayed> |

Mutation rate among loci: Mutation rate is constant

Analysis strategy: Bayesian inference

Proposal distributions for parameter

| Parameter | Proposal       |
|-----------|----------------|
| Theta     | Slice sampling |
| M         | Slice sampling |

Prior distribution for parameter

| Parameter | Prior   | Minimum  | Mean*        | Maximum      | Delta       | Bins |
|-----------|---------|----------|--------------|--------------|-------------|------|
| Theta     | Uniform | 0.000000 | 50.000000    | 100.000000   | 10.000000   | 1500 |
| M         | Uniform | 0.000000 | 37500.000000 | 75000.000000 | 7500.000000 | 1500 |

Markov chain settings: Long chain

|                                              |         |
|----------------------------------------------|---------|
| Number of chains                             | 1       |
| Recorded steps [a]                           | 50000   |
| Increment (record every x step [b])          | 100     |
| Number of concurrent chains (replicates) [c] | 1       |
| Visited (sampled) parameter values [a*b*c]   | 5000000 |
| Number of discard trees per chain (burn-in)  | 2500000 |

Multiple Markov chains:

|                       |                                                   |
|-----------------------|---------------------------------------------------|
| Static heating scheme | 20 chains with temperatures                       |
| 2.40                  | 2.10 2.00 1.95 1.80 1.65 1.50 1.40 1.25 1.10 1.00 |
|                       | Swapping interval is 1                            |

Print options:

|                                                   |                       |
|---------------------------------------------------|-----------------------|
| Data file:                                        | MRO_NGulf_direct.seq  |
| Output file:                                      | MRO_NGulf_subset_run2 |
| Posterior distribution raw histogram file:        | bayesfile             |
| Print data:                                       | No                    |
| Print genealogies [only some for some data type]: | None                  |

## *Data summary*

Datatype: Sequence data

Number of loci: 1

| Population               | Locus | Gene copies |
|--------------------------|-------|-------------|
| 1 BAJA                   | 1     | 30          |
| 2 MIDR                   | 1     | 30          |
| 3 MAIN                   | 1     | 30          |
| Total of all populations | 1     | 90          |

## *Bayesian Analysis: Posterior distribution table*

| Locus | Parameter             | 2.5%    | 25.0%    | Mode     | 75.0%    | 97.5%    | Median   | Mean     |
|-------|-----------------------|---------|----------|----------|----------|----------|----------|----------|
| 1     | $\Theta_1$            | 0.80000 | 16.66667 | 19.10000 | 21.73333 | 26.53333 | 49.36666 | 49.77052 |
| 1     | $\Theta_2$            | 0.00000 | 0.00000  | 0.03333  | 0.53333  | 1.40000  | 0.56667  | 0.24806  |
| 1     | $\Theta_3$            | 0.00000 | 0.00000  | 0.03333  | 3.66667  | 22.93333 | 47.10000 | 49.47357 |
| 1     | $M_{2 \rightarrow 1}$ | 35300.0 | 46450.0  | 51075.0  | 58350.0  | 74550.0  | 52775.0  | 51771.4  |
| 1     | $M_{3 \rightarrow 1}$ | 36550.0 | 52550.0  | 59675.0  | 64700.0  | 75000.0  | 57625.0  | 54928.1  |
| 1     | $M_{1 \rightarrow 2}$ | 8400.0  | 16250.0  | 20075.0  | 22850.0  | 29400.0  | 19075.0  | 18828.0  |
| 1     | $M_{3 \rightarrow 2}$ | 10250.0 | 16600.0  | 19525.0  | 23550.0  | 34900.0  | 21675.0  | 21839.1  |
| 1     | $M_{1 \rightarrow 3}$ | 38050.0 | 53900.0  | 62175.0  | 66000.0  | 75000.0  | 58125.0  | 55651.6  |
| 1     | $M_{2 \rightarrow 3}$ | 40200.0 | 54250.0  | 59225.0  | 64500.0  | 75000.0  | 58975.0  | 56624.1  |

*Bayesian Analysis: Posterior distribution over all loci*

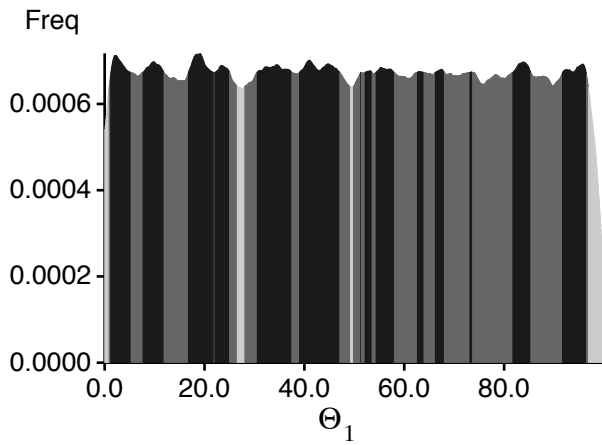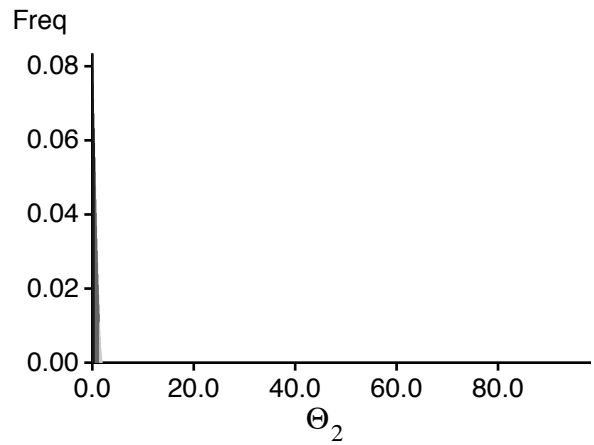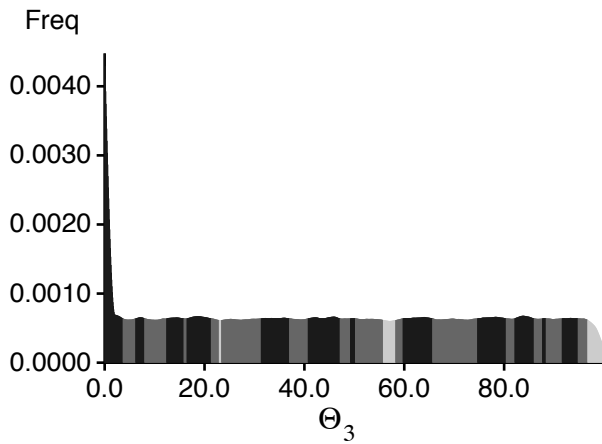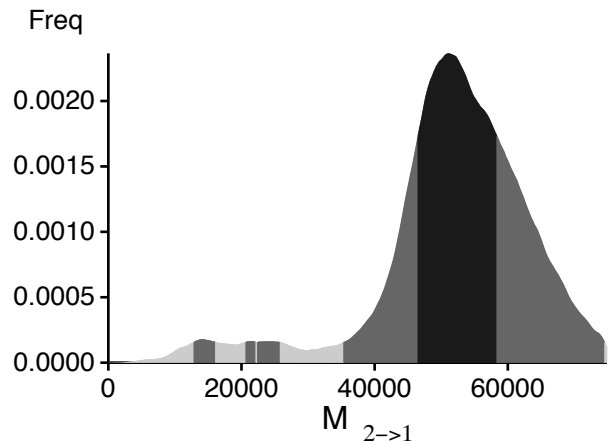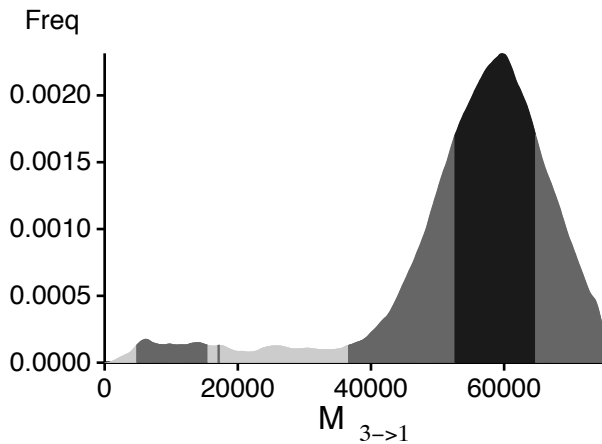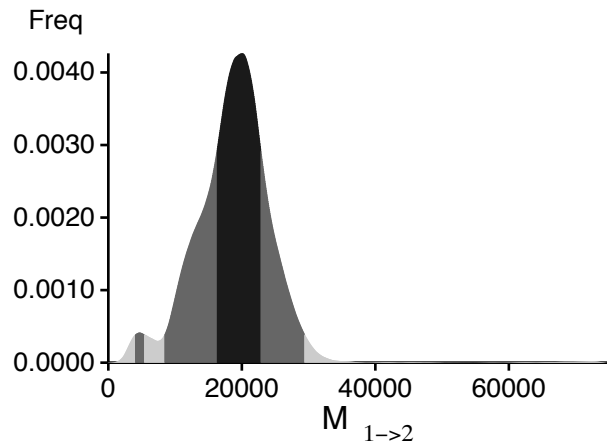

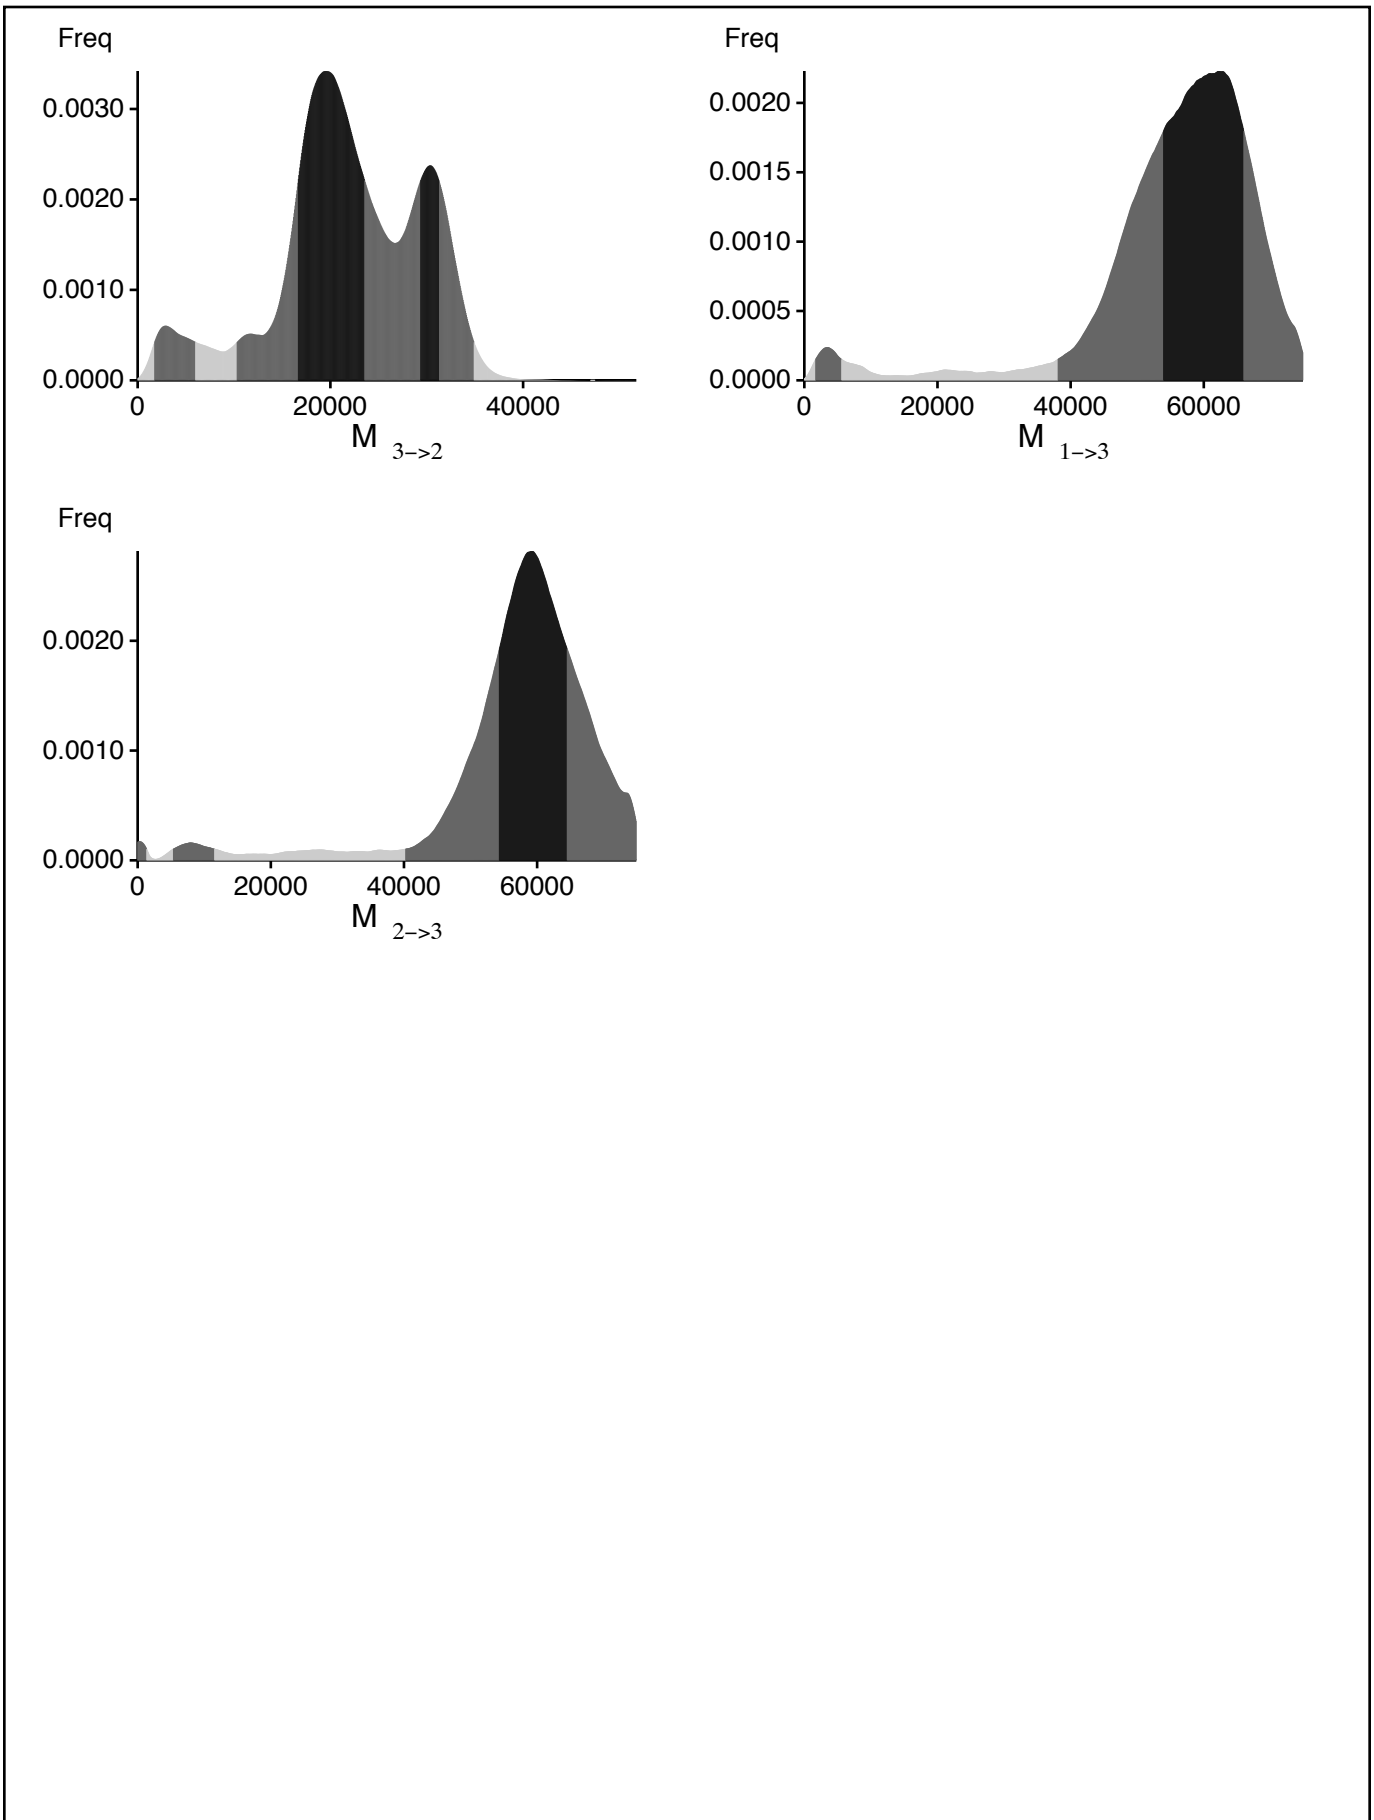



## *Log-Probability of the data given the model (marginal likelihood)*

Use this value for Bayes factor calculations:

$BF = \text{Exp}[\ln(\text{Prob}(D | \text{thisModel})) - \ln(\text{Prob}(D | \text{otherModel}))]$

or as  $LBF = 2 (\ln(\text{Prob}(D | \text{thisModel})) - \ln(\text{Prob}(D | \text{otherModel})))$

shows the support for thisModel]

| Method                    | $\ln(\text{Prob}(D   \text{Model}))$ | Notes |
|---------------------------|--------------------------------------|-------|
| Thermodynamic integration | -2663.662265                         | (1a)  |
|                           | -2662.929522                         | (1b)  |
| Harmonic mean             | -2518.607791                         | (2)   |

(1a, 1b and 2) is an approximation to the marginal likelihood, make sure the program run long enough!

(1a, 1b) and (2) should give a similar result, (2) is considered more

crude than (1), but (1) needs heating with several well-spaced chains,

(1b) is using a Bezier-curve to get better approximations for runs with low number

of heated chains

*Acceptance ratios for all parameters and the genealogies*

| Parameter        | Accepted changes | Ratio   |
|------------------|------------------|---------|
| $\Theta_1$       | 417139/417139    | 1.00000 |
| $\Theta_2$       | 416479/416479    | 1.00000 |
| $\Theta_3$       | 416563/416563    | 1.00000 |
| M <sub>2→1</sub> | 416045/416045    | 1.00000 |
| M <sub>3→1</sub> | 417166/417166    | 1.00000 |
| M <sub>1→2</sub> | 416343/416343    | 1.00000 |
| M <sub>3→2</sub> | 417056/417056    | 1.00000 |
| M <sub>1→3</sub> | 415658/415658    | 1.00000 |
| M <sub>2→3</sub> | 415887/415887    | 1.00000 |
| Genealogies      | 304248/2502671   | 0.12157 |

## *MCMC-Autocorrelation and Effective MCMC Sample Size*

| Parameter             | Autocorrelation | Effective Sampe Size |
|-----------------------|-----------------|----------------------|
| $\Theta_1$            | 0.01312         | 48705.34             |
| $\Theta_2$            | 0.68170         | 9463.51              |
| $\Theta_3$            | 0.03811         | 46329.24             |
| $M_{2 \rightarrow 1}$ | 0.84581         | 4176.90              |
| $M_{3 \rightarrow 1}$ | 0.88221         | 3129.10              |
| $M_{1 \rightarrow 2}$ | 0.84882         | 4088.65              |
| $M_{3 \rightarrow 2}$ | 0.93664         | 1635.93              |
| $M_{1 \rightarrow 3}$ | 0.88135         | 3153.38              |
| $M_{2 \rightarrow 3}$ | 0.87512         | 3329.86              |
| Ln[Prob(DIG)]         | 0.53563         | 15119.74             |

# Example: sequence data set wit two loci [simula

MIGRATION RATE AND POPULATION SIZE ESTIMATION  
 using the coalescent and maximum likelihood or Bayesian inference  
 Migrate-n version 3.2.6 [1776]  
 Program started at Tue Feb 5 16:39:18 2013  
 Program finished at Wed Feb 6 11:20:42 2013



## Options

Datatype: DNA sequence data

Inheritance scalers in use for Thetas: 1.00

[Each Theta uses the (true) ineritance scalar of the first locus as a reference]

Random number seed: (with internal timer) 160670253

Start parameters:

Theta values were generated from the FST-calculation

M values were generated from the FST-calculation

Connection type matrix:

where m = average (average over a group of Thetas or M,  
 s = symmetric M, S = symmetric 4Nm, 0 = zero, and not estimated,  
 \* = free to vary, Thetas are on diagonal

| Population | 1 | 2 | 3 |
|------------|---|---|---|
| 1 BAJA     | * | * | * |
| 2 MIDR     | * | * | * |
| 3 MAIN     | * | * | * |

Order of parameters:

|   |                      |             |
|---|----------------------|-------------|
| 1 | $\Theta_1$           | <displayed> |
| 2 | $\Theta_2$           | <displayed> |
| 3 | $\Theta_3$           | <displayed> |
| 4 | M <sub>2-&gt;1</sub> | <displayed> |
| 5 | M <sub>3-&gt;1</sub> | <displayed> |
| 6 | M <sub>1-&gt;2</sub> | <displayed> |

```

7      M      3->2      <displayed>
8      M      1->3      <displayed>
9      M      2->3      <displayed>
    
```

Mutation rate among loci: Mutation rate is constant

Analysis strategy: Bayesian inference

Proposal distributions for parameter

| Parameter | Proposal       |
|-----------|----------------|
| Theta     | Slice sampling |
| M         | Slice sampling |

Prior distribution for parameter

| Parameter | Prior   | Minimum  | Mean*        | Maximum      | Delta       | Bins |
|-----------|---------|----------|--------------|--------------|-------------|------|
| Theta     | Uniform | 0.000000 | 50.000000    | 100.000000   | 10.000000   | 1500 |
| M         | Uniform | 0.000000 | 37500.000000 | 75000.000000 | 7500.000000 | 1500 |

Markov chain settings: Long chain

|                                              |         |
|----------------------------------------------|---------|
| Number of chains                             | 1       |
| Recorded steps [a]                           | 50000   |
| Increment (record every x step [b])          | 100     |
| Number of concurrent chains (replicates) [c] | 1       |
| Visited (sampled) parameter values [a*b*c]   | 5000000 |
| Number of discard trees per chain (burn-in)  | 2500000 |

Multiple Markov chains:

|                                                                                      |                             |
|--------------------------------------------------------------------------------------|-----------------------------|
| Static heating scheme                                                                | 20 chains with temperatures |
| 2.40    2.10    2.00    1.95    1.80    1.65    1.50    1.40    1.25    1.10    1.00 | Swapping interval is 1      |

Print options:

|                                                   |                       |
|---------------------------------------------------|-----------------------|
| Data file:                                        | MRO_NGulf_direct.seq  |
| Output file:                                      | MRO_NGulf_subset_run3 |
| Posterior distribution raw histogram file:        | bayesfile             |
| Print data:                                       | No                    |
| Print genealogies [only some for some data type]: | None                  |

## *Data summary*

Datatype: Sequence data

Number of loci: 1

| Population               | Locus | Gene copies |
|--------------------------|-------|-------------|
| 1 BAJA                   | 1     | 30          |
| 2 MIDR                   | 1     | 30          |
| 3 MAIN                   | 1     | 30          |
| Total of all populations | 1     | 90          |

## *Bayesian Analysis: Posterior distribution table*

| Locus | Parameter             | 2.5%     | 25.0%    | Mode     | 75.0%    | 97.5%    | Median   | Mean     |
|-------|-----------------------|----------|----------|----------|----------|----------|----------|----------|
| 1     | $\Theta_1$            | 51.93333 | 96.53333 | 98.23333 | 99.13333 | 99.26667 | 50.56667 | 50.18251 |
| 1     | $\Theta_2$            | 0.00000  | 0.00000  | 0.03333  | 2.73333  | 26.86667 | 45.10000 | 49.09784 |
| 1     | $\Theta_3$            | 0.00000  | 0.00000  | 0.03333  | 0.53333  | 1.40000  | 0.56667  | 0.22058  |
| 1     | $M_{2 \rightarrow 1}$ | 40250.0  | 53850.0  | 59175.0  | 63400.0  | 75000.0  | 57675.0  | 54331.2  |
| 1     | $M_{3 \rightarrow 1}$ | 42900.0  | 54900.0  | 59375.0  | 64350.0  | 75000.0  | 59125.0  | 55467.9  |
| 1     | $M_{1 \rightarrow 2}$ | 41550.0  | 54850.0  | 60425.0  | 64300.0  | 75000.0  | 58475.0  | 55218.8  |
| 1     | $M_{3 \rightarrow 2}$ | 39050.0  | 51650.0  | 55625.0  | 60550.0  | 74700.0  | 56075.0  | 54041.8  |
| 1     | $M_{1 \rightarrow 3}$ | 9250.0   | 17400.0  | 19775.0  | 22450.0  | 27250.0  | 19375.0  | 18059.5  |
| 1     | $M_{2 \rightarrow 3}$ | 12750.0  | 19950.0  | 22425.0  | 24750.0  | 35100.0  | 24025.0  | 23236.4  |

### Bayesian Analysis: Posterior distribution over all loci

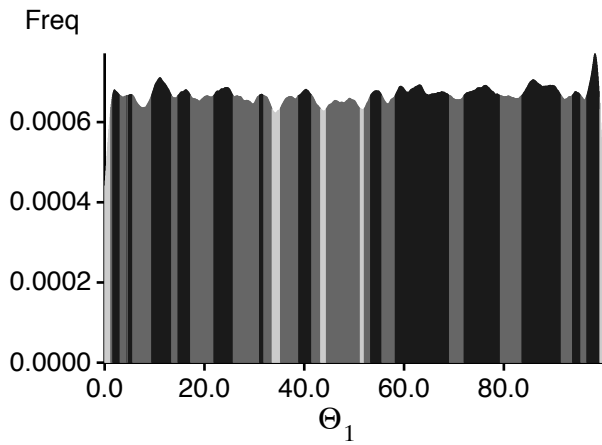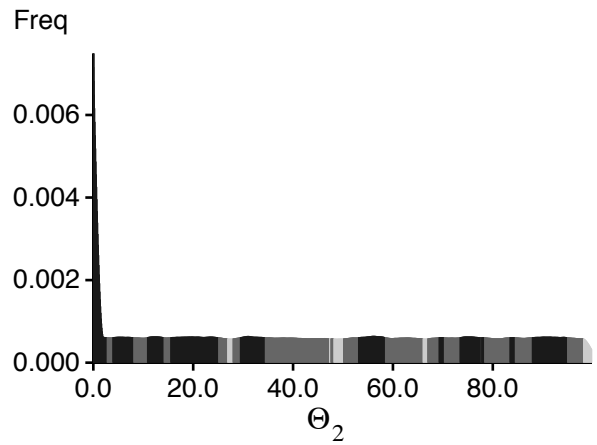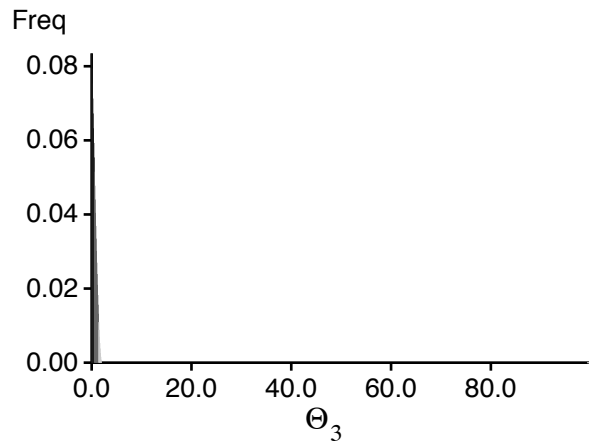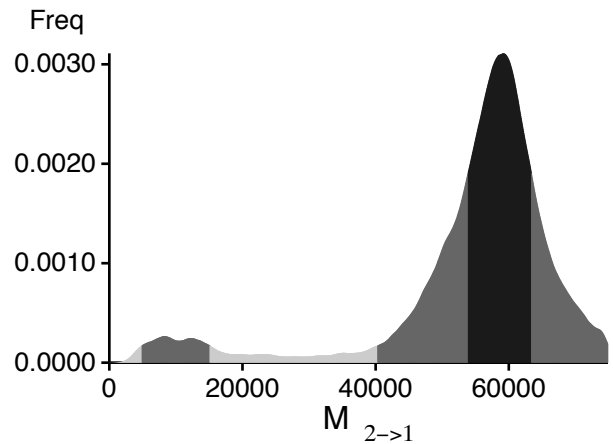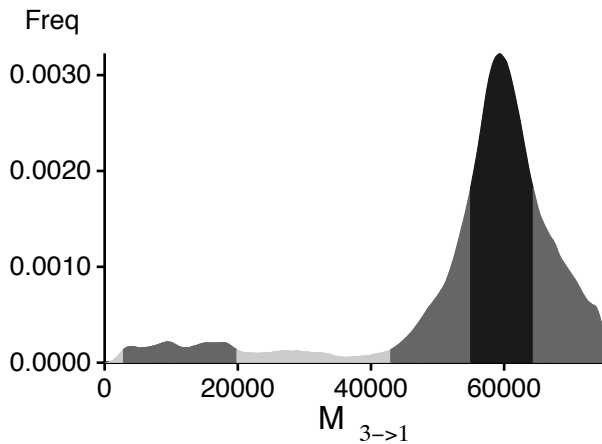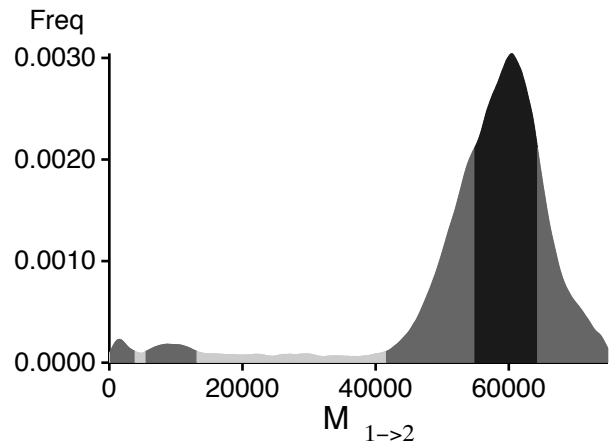



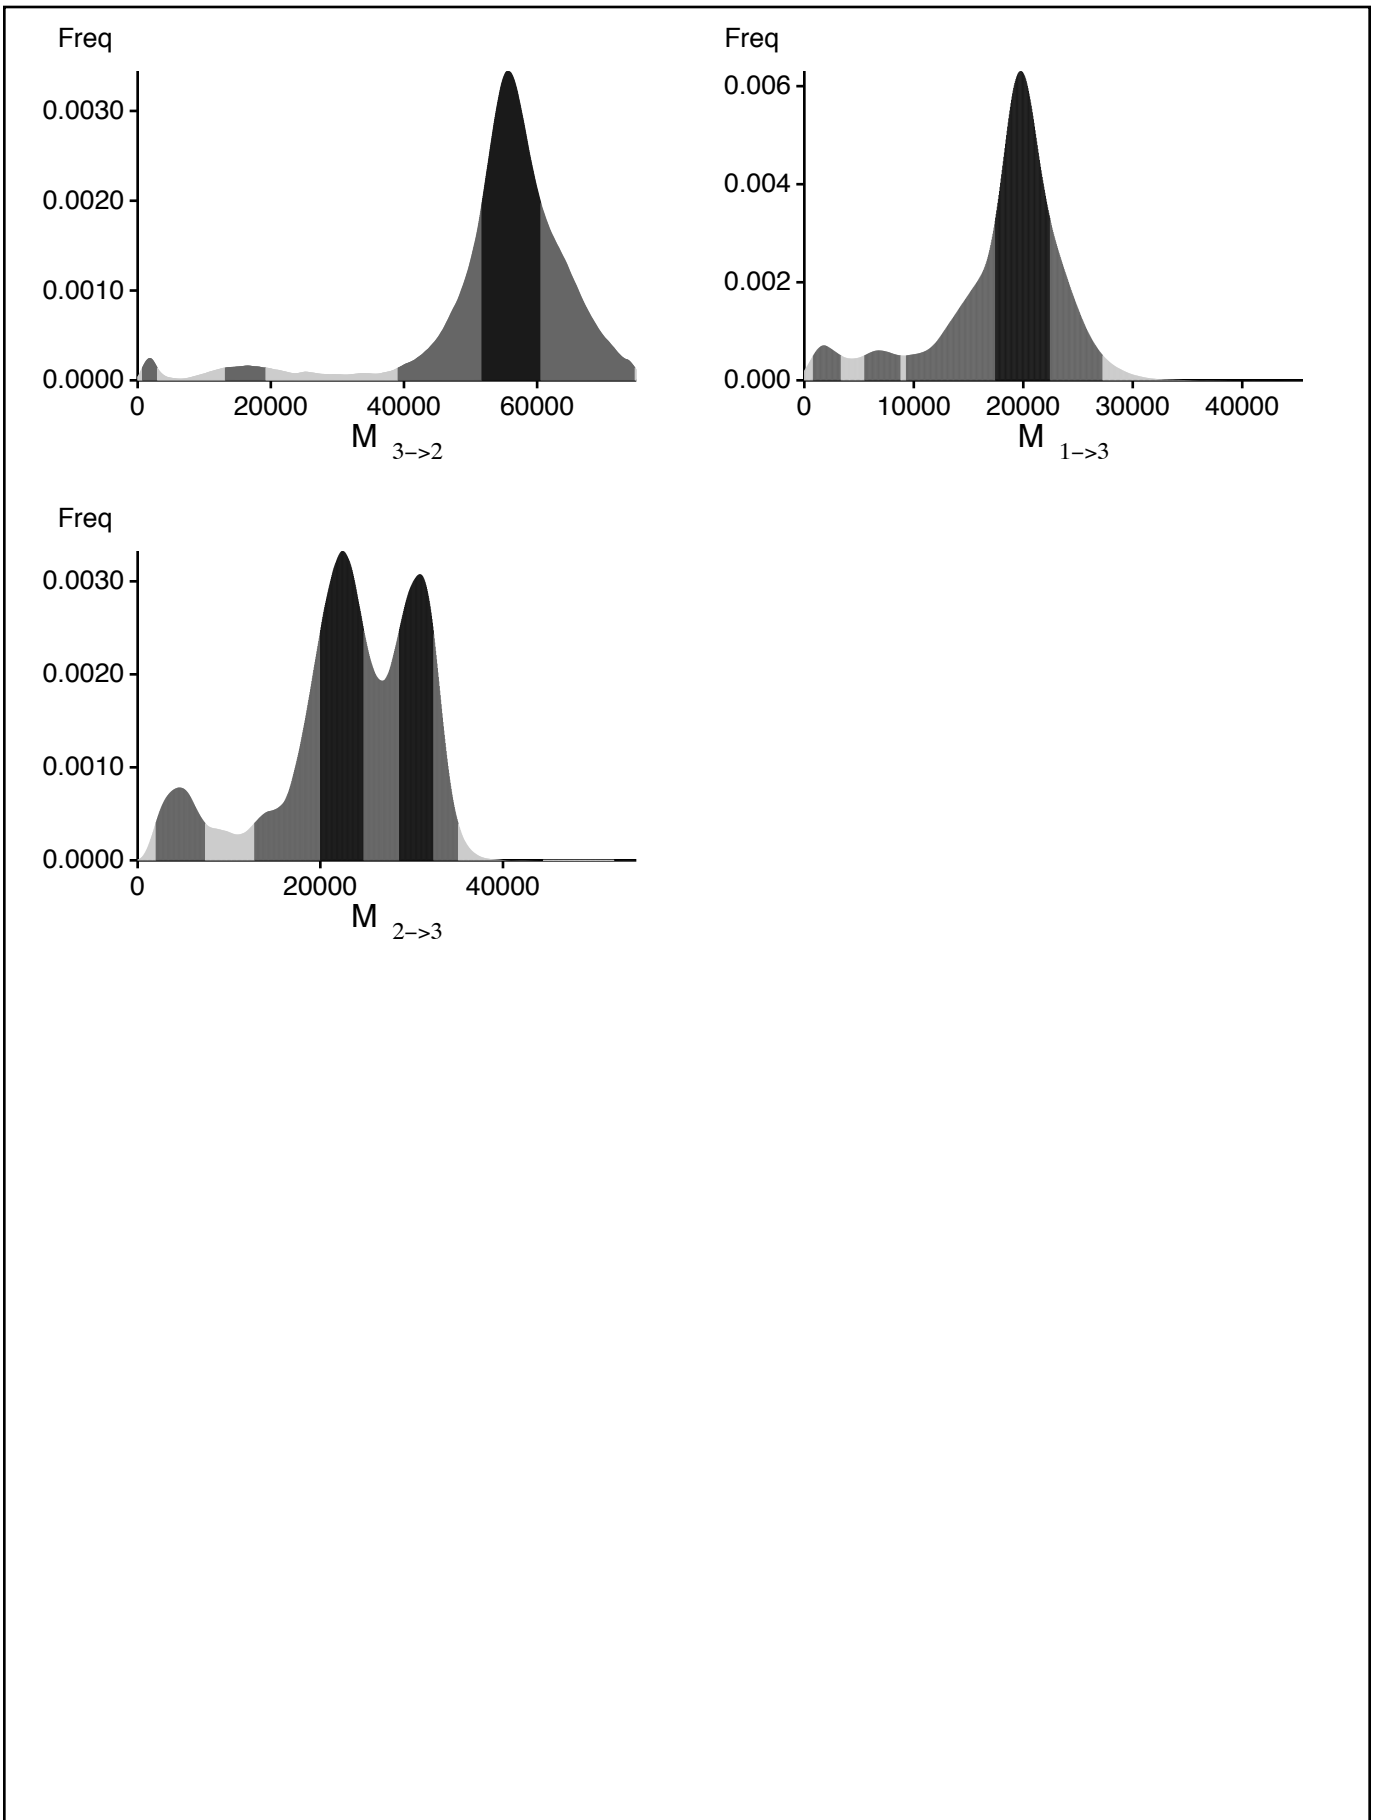

## *Log-Probability of the data given the model (marginal likelihood)*

Use this value for Bayes factor calculations:

$BF = \text{Exp}[\ln(\text{Prob}(D | \text{thisModel})) - \ln(\text{Prob}(D | \text{otherModel}))]$

or as  $LBF = 2 (\ln(\text{Prob}(D | \text{thisModel})) - \ln(\text{Prob}(D | \text{otherModel})))$

shows the support for thisModel]

| Method                    | $\ln(\text{Prob}(D   \text{Model}))$ | Notes |
|---------------------------|--------------------------------------|-------|
| Thermodynamic integration | -2646.847888                         | (1a)  |
|                           | -2645.725295                         | (1b)  |
| Harmonic mean             | -2522.695382                         | (2)   |

(1a, 1b and 2) is an approximation to the marginal likelihood, make sure the program run long enough!

(1a, 1b) and (2) should give a similar result, (2) is considered more

crude than (1), but (1) needs heating with several well-spaced chains,

(1b) is using a Bezier-curve to get better approximations for runs with low number of heated chains

*Acceptance ratios for all parameters and the genealogies*

| Parameter        | Accepted changes | Ratio   |
|------------------|------------------|---------|
| $\Theta_1$       | 417549/417549    | 1.00000 |
| $\Theta_2$       | 416600/416600    | 1.00000 |
| $\Theta_3$       | 416315/416315    | 1.00000 |
| M <sub>2→1</sub> | 415455/415455    | 1.00000 |
| M <sub>3→1</sub> | 416012/416012    | 1.00000 |
| M <sub>1→2</sub> | 415927/415927    | 1.00000 |
| M <sub>3→2</sub> | 416774/416774    | 1.00000 |
| M <sub>1→3</sub> | 416409/416409    | 1.00000 |
| M <sub>2→3</sub> | 416620/416620    | 1.00000 |
| Genealogies      | 252121/2502120   | 0.10076 |

## *MCMC-Autocorrelation and Effective MCMC Sample Size*

| Parameter                     | Autocorrelation | Effective Sample Size |
|-------------------------------|-----------------|-----------------------|
| $\Theta_1$                    | 0.00913         | 49094.88              |
| $\Theta_2$                    | 0.05775         | 44539.92              |
| $\Theta_3$                    | 0.67196         | 9810.01               |
| $M_{2 \rightarrow 1}$         | 0.89595         | 2744.02               |
| $M_{3 \rightarrow 1}$         | 0.92465         | 1957.50               |
| $M_{1 \rightarrow 2}$         | 0.90275         | 2555.41               |
| $M_{3 \rightarrow 2}$         | 0.88179         | 3140.98               |
| $M_{1 \rightarrow 3}$         | 0.90244         | 2564.16               |
| $M_{2 \rightarrow 3}$         | 0.94632         | 1378.94               |
| $\text{Ln}[\text{Prob(DIG)}]$ | 0.46867         | 18088.71              |

## *Warnings*

You should most likely rerun your analysis after improving run parameters.

Param 1 (Locus 1): Upper prior boundary seems too low!
