# Supplementary material for: Asymmetric connectivity of spawning aggregations of a commercially important marine fish using a multidisciplinary approach
Source: PubMed Central journal article supplement (PMC4137664; doi:10.7717/peerj.511), 2014-08-07
Supplement: peerj-02-511-s009.pdf [file peerj-02-511-s009.pdf]

# Example: sequence data set wit two loci [simula

MIGRATION RATE AND POPULATION SIZE ESTIMATION  
 using the coalescent and maximum likelihood or Bayesian inference  
 Migrate-n version 3.2.16 [1920]  
 Compiled for a SYMMETRIC MULTIPROCESSORS  
 Program started at Tue Jan 29 09:43:29 2013  
 Program finished at Tue Jan 29 11:41:40 2013

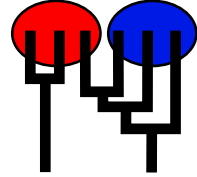

## Options

Datatype: DNA sequence data

Inheritance scalers in use for Thetas: 1.00

[Each Theta uses the (true) inheritance scalar of the first locus as a reference]

Random number seed: (with internal timer) 1352947789

Start parameters:

Theta values were generated from the FST-calculation

M values were generated from the FST-calculation

Connection type matrix:

where m = average (average over a group of Thetas or M,  
 s = symmetric M, S = symmetric 4Nm, 0 = zero, and not estimated,  
 \* = free to vary, Thetas are on diagonal

| Population | 1 | 2 | 3 |
|------------|---|---|---|
| 1 BAJA     | * | 0 | 0 |
| 2 MIDR     | * | * | 0 |
| 3 MAIN     | * | * | * |

Order of parameters:

|   |                       |             |
|---|-----------------------|-------------|
| 1 | $\Theta_1$            | <displayed> |
| 2 | $\Theta_2$            | <displayed> |
| 3 | $\Theta_3$            | <displayed> |
| 6 | $M_{1 \rightarrow 2}$ | <displayed> |
| 8 | $M_{1 \rightarrow 3}$ | <displayed> |

9 M<sub>2->3</sub> <displayed>

Mutation rate among loci: Mutation rate is constant

Analysis strategy: Bayesian inference

Proposal distributions for parameter

| Parameter | Proposal       |
|-----------|----------------|
| Theta     | Slice sampling |
| M         | Slice sampling |

Prior distribution for parameter

| Parameter | Prior   | Minimum  | Mean*        | Maximum      | Delta       | Bins |
|-----------|---------|----------|--------------|--------------|-------------|------|
| Theta     | Uniform | 0.000000 | 50.000000    | 100.000000   | 10.000000   | 1500 |
| M         | Uniform | 0.000000 | 37500.000000 | 75000.000000 | 7500.000000 | 1500 |

Markov chain settings: Long chain

|                                              |         |
|----------------------------------------------|---------|
| Number of chains                             | 1       |
| Recorded steps [a]                           | 50000   |
| Increment (record every x step [b])          | 100     |
| Number of concurrent chains (replicates) [c] | 1       |
| Visited (sampled) parameter values [a*b*c]   | 5000000 |
| Number of discard trees per chain (burn-in)  | 2500000 |

Multiple Markov chains:

|                       |                             |      |      |      |      |      |      |      |      |      |      |
|-----------------------|-----------------------------|------|------|------|------|------|------|------|------|------|------|
| Static heating scheme | 20 chains with temperatures |      |      |      |      |      |      |      |      |      |      |
|                       | 2.40                        | 2.10 | 2.00 | 1.95 | 1.80 | 1.65 | 1.50 | 1.40 | 1.25 | 1.10 | 1.00 |
|                       | Swapping interval is 1      |      |      |      |      |      |      |      |      |      |      |

Print options:

|                                                   |                        |
|---------------------------------------------------|------------------------|
| Data file:                                        | MRO_NGulf_direct.seq   |
| Output file:                                      | MRO_NGulf_Direct2_run1 |
| Posterior distribution raw histogram file:        | bayesfile              |
| Print data:                                       | No                     |
| Print genealogies [only some for some data type]: | None                   |

## *Data summary*

Datatype: Sequence data

Number of loci: 1

| Population               | Locus | Gene copies |
|--------------------------|-------|-------------|
| 1 BAJA                   | 1     | 30          |
| 2 MIDR                   | 1     | 30          |
| 3 MAIN                   | 1     | 30          |
| Total of all populations | 1     | 90          |

## *Bayesian Analysis: Posterior distribution table*

| Locus | Parameter             | 2.5%     | 25.0%    | Mode     | 75.0%    | 97.5%    | Median   | Mean     |
|-------|-----------------------|----------|----------|----------|----------|----------|----------|----------|
| 1     | $\Theta_1$            | 0.00000  | 0.00000  | 0.03333  | 0.53333  | 1.40000  | 0.56667  | 0.00736  |
| 1     | $\Theta_2$            | 1.00000  | 40.06667 | 45.83333 | 47.20000 | 48.00000 | 49.63334 | 49.98975 |
| 1     | $\Theta_3$            | 81.20000 | 97.06667 | 98.30000 | 98.93333 | 99.13333 | 50.03333 | 49.93806 |
| 1     | $M_{1 \rightarrow 2}$ | 4050.0   | 6800.0   | 8675.0   | 10850.0  | 17050.0  | 9525.0   | 10032.4  |
| 1     | $M_{1 \rightarrow 3}$ | 3200.0   | 10550.0  | 18775.0  | 33050.0  | 65450.0  | 28025.0  | 30690.1  |
| 1     | $M_{2 \rightarrow 3}$ | 15450.0  | 30650.0  | 48975.0  | 56750.0  | 74900.0  | 44375.0  | 44198.1  |

*Bayesian Analysis: Posterior distribution over all loci*

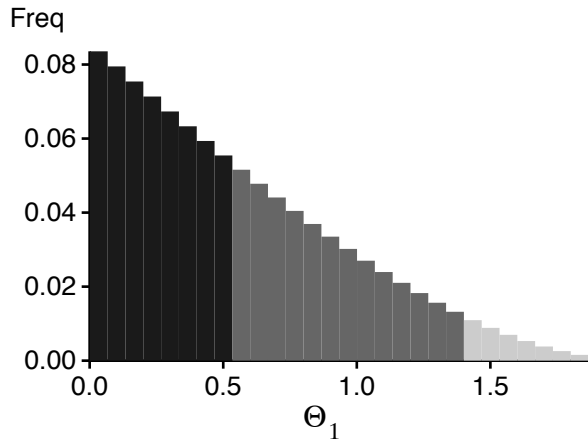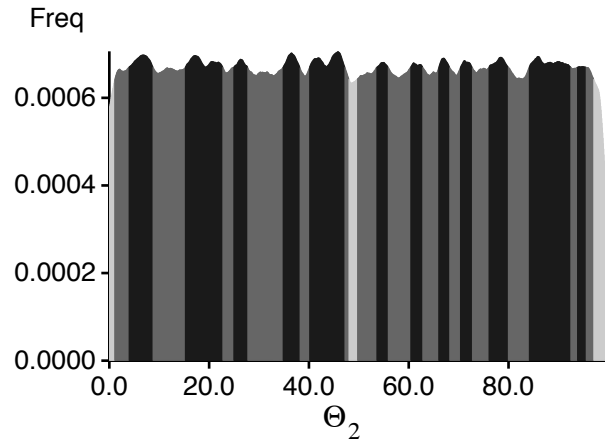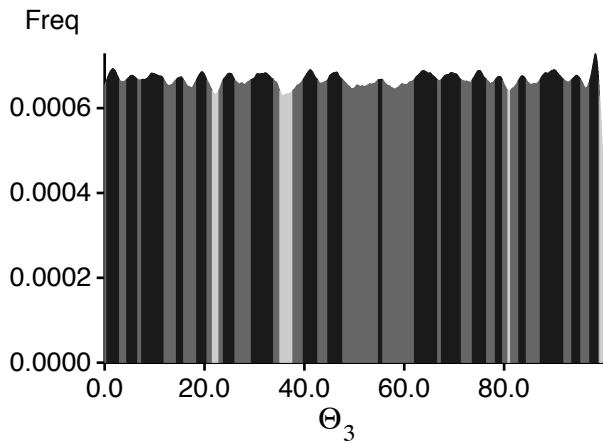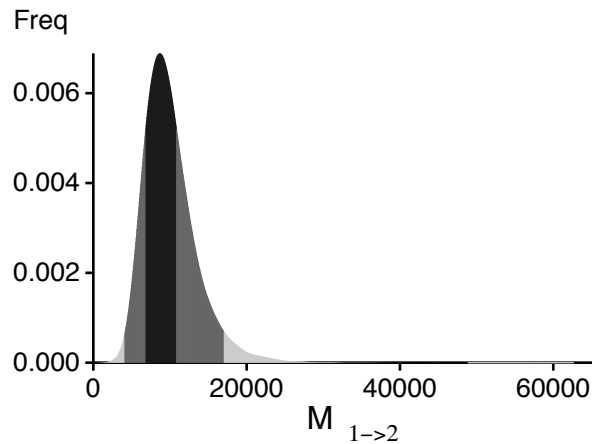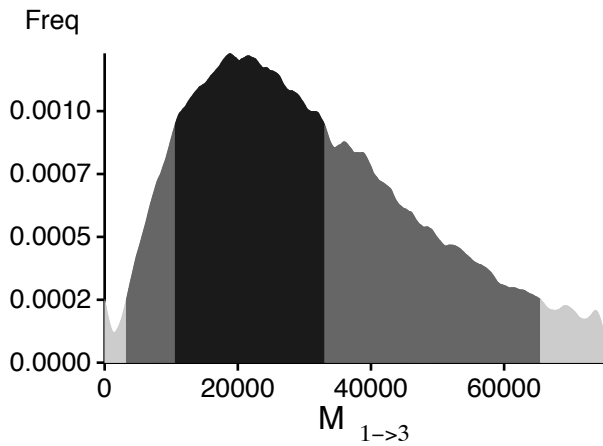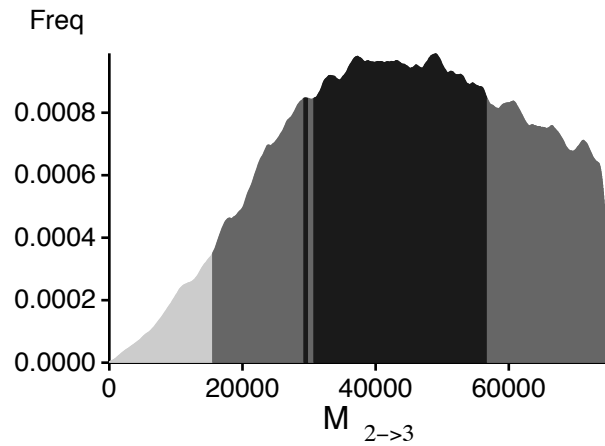

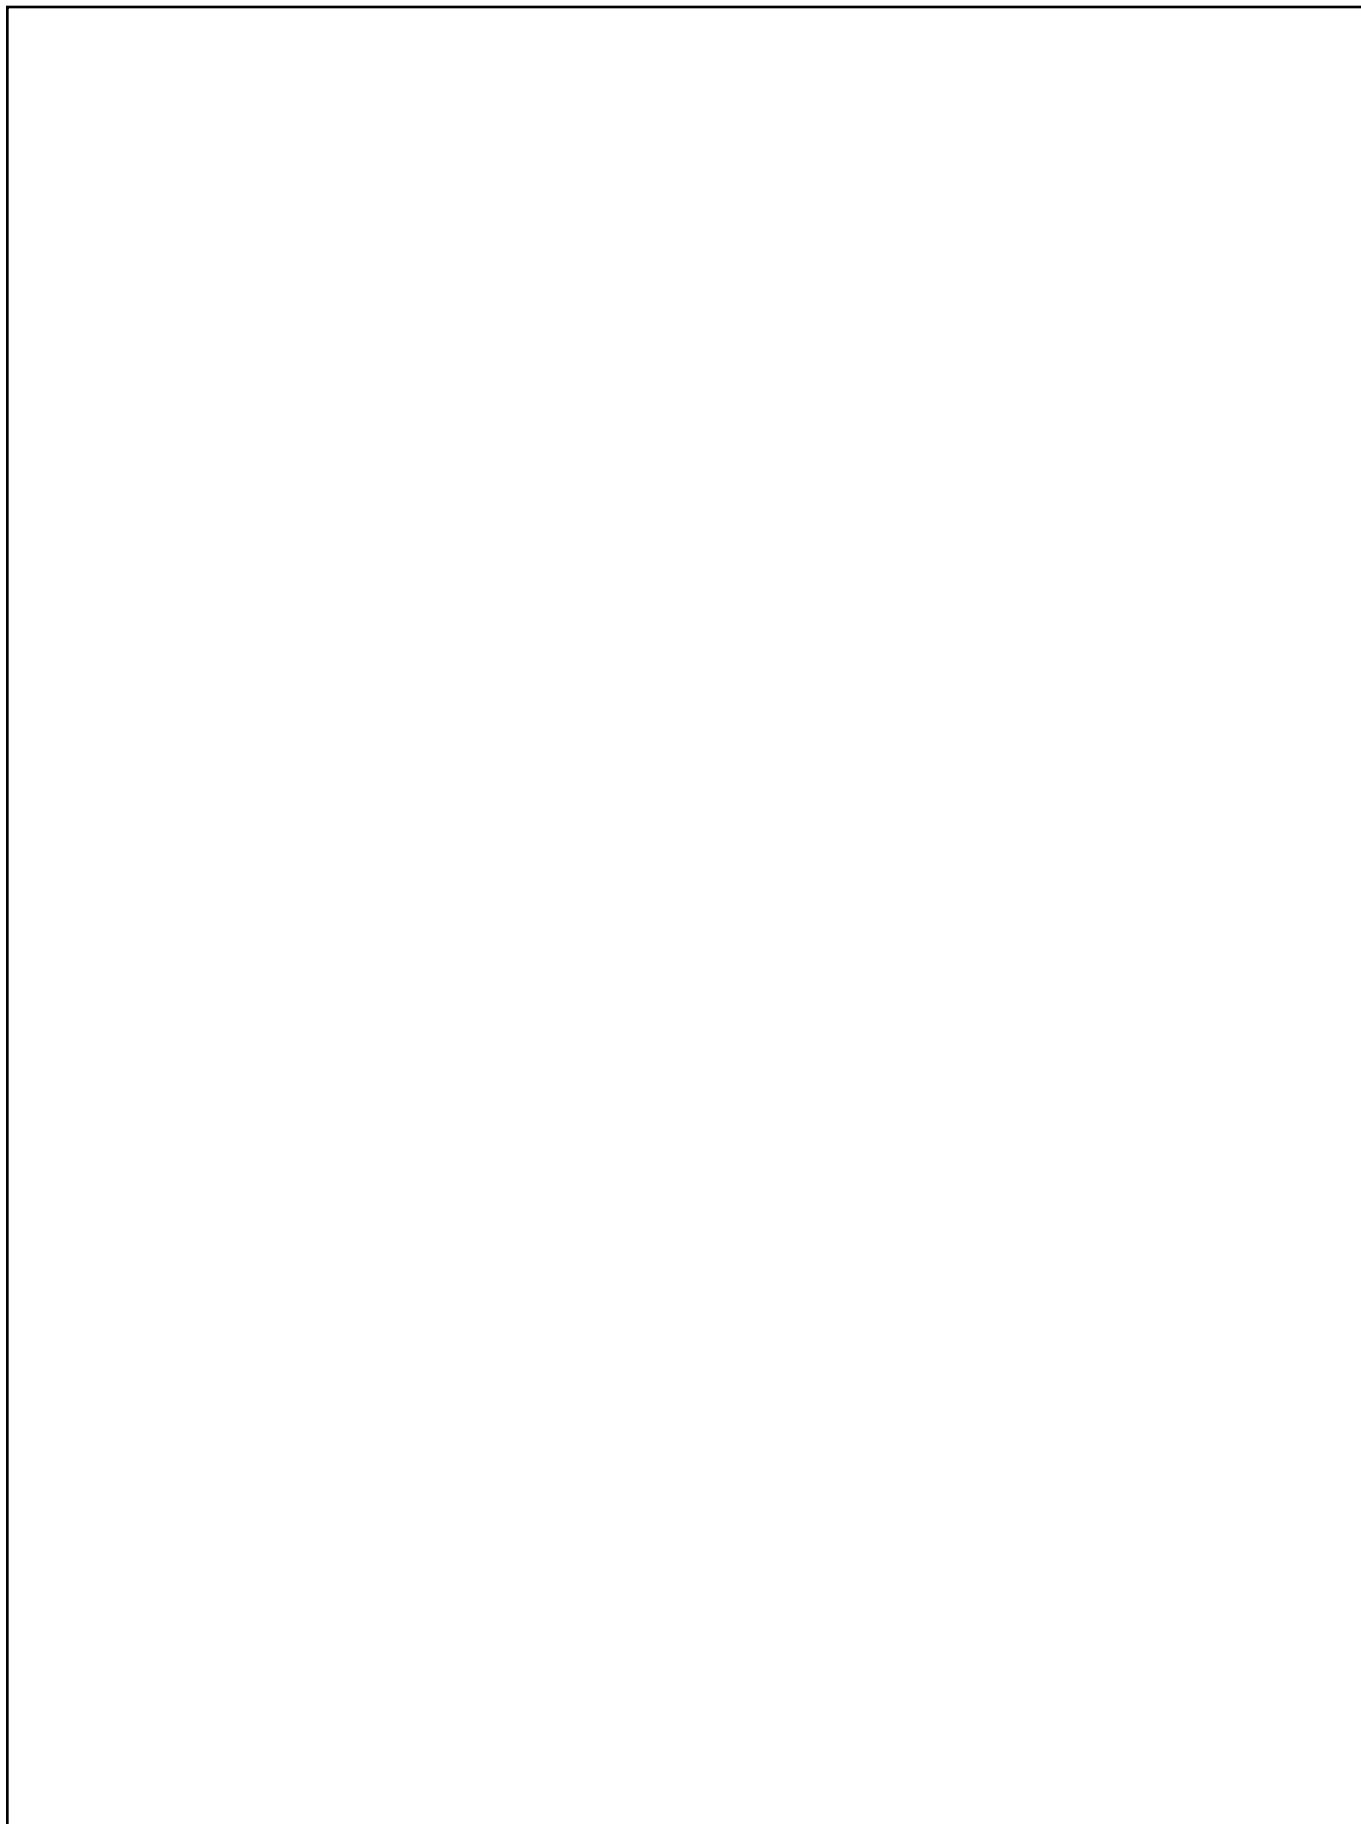

## *Log-Probability of the data given the model (marginal likelihood)*

Use this value for Bayes factor calculations:

$BF = \text{Exp}[\ln(\text{Prob}(D | \text{thisModel})) - \ln(\text{Prob}(D | \text{otherModel}))]$

or as  $LBF = 2 (\ln(\text{Prob}(D | \text{thisModel})) - \ln(\text{Prob}(D | \text{otherModel})))$

shows the support for thisModel]

| Method                    | $\ln(\text{Prob}(D   \text{Model}))$ | Notes |
|---------------------------|--------------------------------------|-------|
| Thermodynamic integration | -2661.014048                         | (1a)  |
|                           | -2658.636834                         | (1b)  |
| Harmonic mean             | -2513.071104                         | (2)   |

(1a, 1b and 2) is an approximation to the marginal likelihood, make sure the program run long enough!

(1a, 1b) and (2) should give a similar result, (2) is considered more

crude than (1), but (1) needs heating with several well-spaced chains,

(1b) is using a Bezier-curve to get better approximations for runs with low number

of heated chains

*Acceptance ratios for all parameters and the genealogies*

| Parameter             | Accepted changes | Ratio   |
|-----------------------|------------------|---------|
| $\Theta_1$            | 624587/624587    | 1.00000 |
| $\Theta_2$            | 625395/625395    | 1.00000 |
| $\Theta_3$            | 625200/625200    | 1.00000 |
| $M_{1 \rightarrow 2}$ | 624409/624409    | 1.00000 |
| $M_{1 \rightarrow 3}$ | 625542/625542    | 1.00000 |
| $M_{2 \rightarrow 3}$ | 626232/626232    | 1.00000 |
| Genealogies           | 493698/2498912   | 0.19757 |



## *MCMC-Autocorrelation and Effective MCMC Sample Size*

| Parameter             | Autocorrelation | Effective Sampe Size |
|-----------------------|-----------------|----------------------|
| $\Theta_1$            | 0.36828         | 23084.65             |
| $\Theta_2$            | 0.00592         | 49411.09             |
| $\Theta_3$            | -0.00749        | 50755.05             |
| $M_{1 \rightarrow 2}$ | 0.50259         | 16551.69             |
| $M_{1 \rightarrow 3}$ | 0.45867         | 18555.64             |
| $M_{2 \rightarrow 3}$ | 0.48218         | 17468.08             |
| Ln[Prob(DIG)]         | 0.53727         | 15050.49             |

## *Potential Problems*

This section reports potential problems with your run, but such reporting is often not very accurate. With many parameters in a multilocus analysis, it is very common that some parameters for some loci will not be very informative, triggering suggestions (for example to increase the prior range) that are not sensible. This suggestion tool will improve with time, therefore do not blindly follow its suggestions. If some parameters are flagged, inspect the tables carefully and judge whether an action is required. For example, if you run a Bayesian inference with sequence data, for macroscopic species there is rarely the need to increase the prior for Theta beyond 0.1; but if you use microsatellites it is rather common that your prior distribution for Theta should have a range from 0.0 to 100 or more. With many populations ( $>3$ ) it is also very common that some migration routes are estimated poorly because the data contains little or no information for that route. Increasing the range will not help in such situations, reducing number of parameters may help in such situations.

Param 3 (Locus 1): Upper prior boundary seems too low!

# Example: sequence data set wit two loci [simula

MIGRATION RATE AND POPULATION SIZE ESTIMATION  
 using the coalescent and maximum likelihood or Bayesian inference  
 Migrate-n version 3.2.16 [1920]  
 Compiled for a SYMMETRIC MULTIPROCESSORS  
 Program started at Tue Jan 29 15:26:57 2013  
 Program finished at Thu Jan 31 09:59:52 2013



## Options

Datatype: DNA sequence data

Inheritance scalers in use for Thetas: 1.00

[Each Theta uses the (true) inheritance scalar of the first locus as a reference]

Random number seed: (with internal timer) 996106619

Start parameters:

Theta values were generated from the FST-calculation

M values were generated from the FST-calculation

Connection type matrix:

where m = average (average over a group of Thetas or M,  
 s = symmetric M, S = symmetric 4Nm, 0 = zero, and not estimated,  
 \* = free to vary, Thetas are on diagonal

| Population | 1 | 2 | 3 |
|------------|---|---|---|
| 1 BAJA     | * | 0 | 0 |
| 2 MIDR     | * | * | 0 |
| 3 MAIN     | * | * | * |

Order of parameters:

|   |                       |             |
|---|-----------------------|-------------|
| 1 | $\Theta_1$            | <displayed> |
| 2 | $\Theta_2$            | <displayed> |
| 3 | $\Theta_3$            | <displayed> |
| 6 | $M_{1 \rightarrow 2}$ | <displayed> |
| 8 | $M_{1 \rightarrow 3}$ | <displayed> |

```

9          M 2->3          <displayed>

Mutation rate among loci:          Mutation rate is constant

Analysis strategy:          Bayesian inference

Proposal distributions for parameter
Parameter          Proposal
Theta          Slice sampling
M          Slice sampling

Prior distribution for parameter
Parameter    Prior    Minimum    Mean*    Maximum    Delta    Bins
Theta    Uniform    0.000000    50.000000    100.000000    10.000000    1500
M    Uniform    0.000000    37500.000000    75000.000000    7500.000000    1500

Markov chain settings:          Long chain
Number of chains          1
  Recorded steps [a]          50000
  Increment (record every x step [b])          100
  Number of concurrent chains (replicates) [c]          1
  Visited (sampled) parameter values [a*b*c]          5000000
  Number of discard trees per chain (burn-in)          2500000

Multiple Markov chains:
  Static heating scheme          20 chains with temperatures
2.40    2.10    2.00    1.95    1.80    1.65    1.50    1.40    1.25    1.10    1.00
          Swapping interval is 1

Print options:
  Data file:          MRO_NGulf_direct.seq
  Output file:          MRO_NGulf_Direct2_run2
  Posterior distribution raw histogram file:          bayesfile
  Print data:          No
  Print genealogies [only some for some data type]:          None
  
```

## *Data summary*

Datatype: Sequence data

Number of loci: 1

| Population               | Locus | Gene copies |
|--------------------------|-------|-------------|
| 1 BAJA                   | 1     | 30          |
| 2 MIDR                   | 1     | 30          |
| 3 MAIN                   | 1     | 30          |
| Total of all populations | 1     | 90          |

## *Bayesian Analysis: Posterior distribution table*

| Locus | Parameter             | 2.5%     | 25.0%    | Mode     | 75.0%    | 97.5%    | Median   | Mean     |
|-------|-----------------------|----------|----------|----------|----------|----------|----------|----------|
| 1     | $\Theta_1$            | 0.00000  | 0.00000  | 0.03333  | 0.53333  | 1.40000  | 0.56667  | 0.00752  |
| 1     | $\Theta_2$            | 3.00000  | 25.60000 | 26.96667 | 29.40000 | 46.06667 | 50.10000 | 50.09869 |
| 1     | $\Theta_3$            | 29.26667 | 30.13333 | 32.03333 | 33.80000 | 44.66667 | 49.90000 | 50.03272 |
| 1     | $M_{1 \rightarrow 2}$ | 4100.0   | 6700.0   | 8525.0   | 10700.0  | 16700.0  | 9425.0   | 9930.3   |
| 1     | $M_{1 \rightarrow 3}$ | 2550.0   | 10150.0  | 20275.0  | 30900.0  | 61850.0  | 26125.0  | 28985.9  |
| 1     | $M_{2 \rightarrow 3}$ | 15750.0  | 34950.0  | 46125.0  | 60650.0  | 75000.0  | 46075.0  | 45358.6  |

## *Bayesian Analysis: Posterior distribution over all loci*

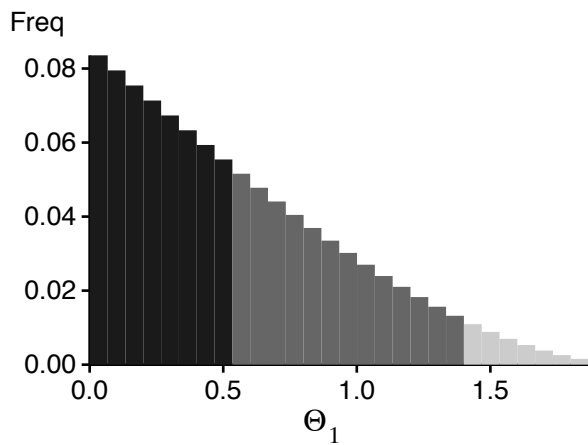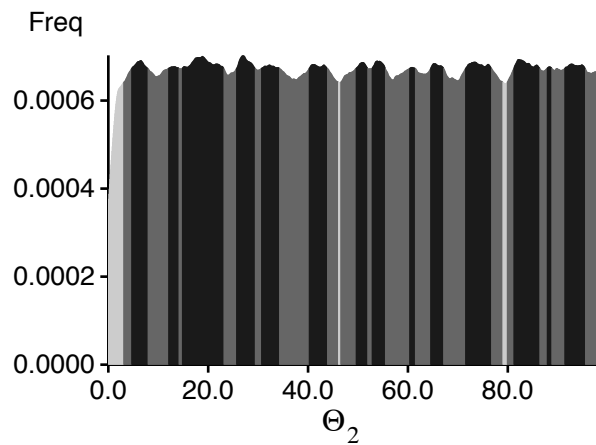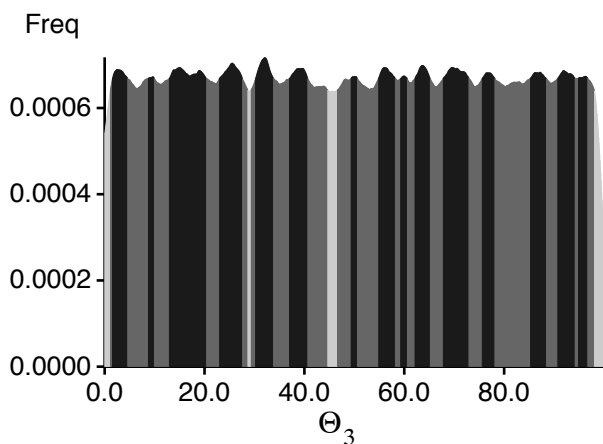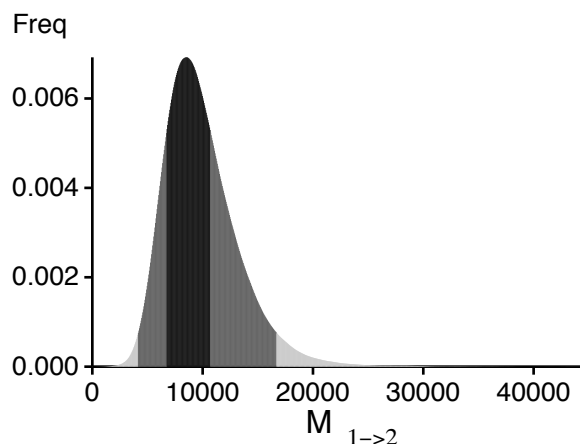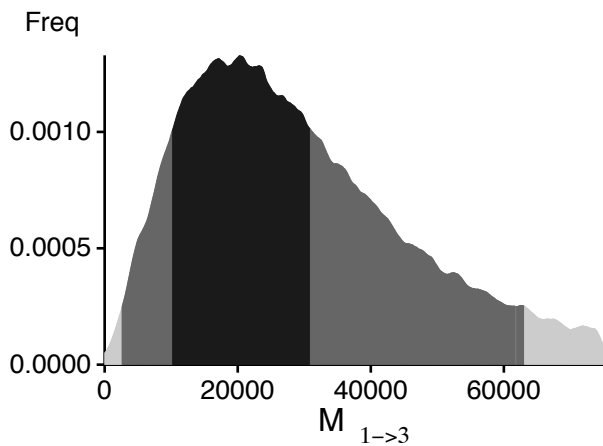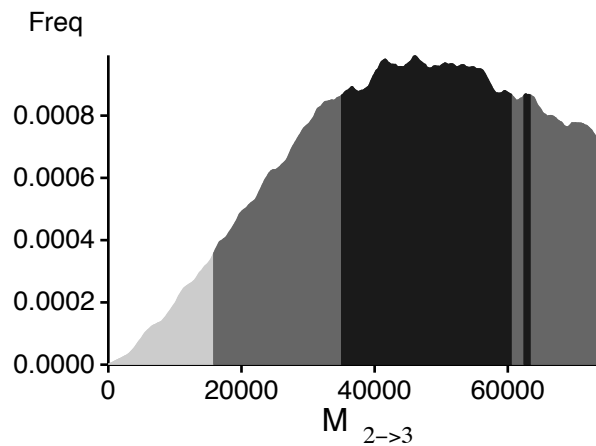

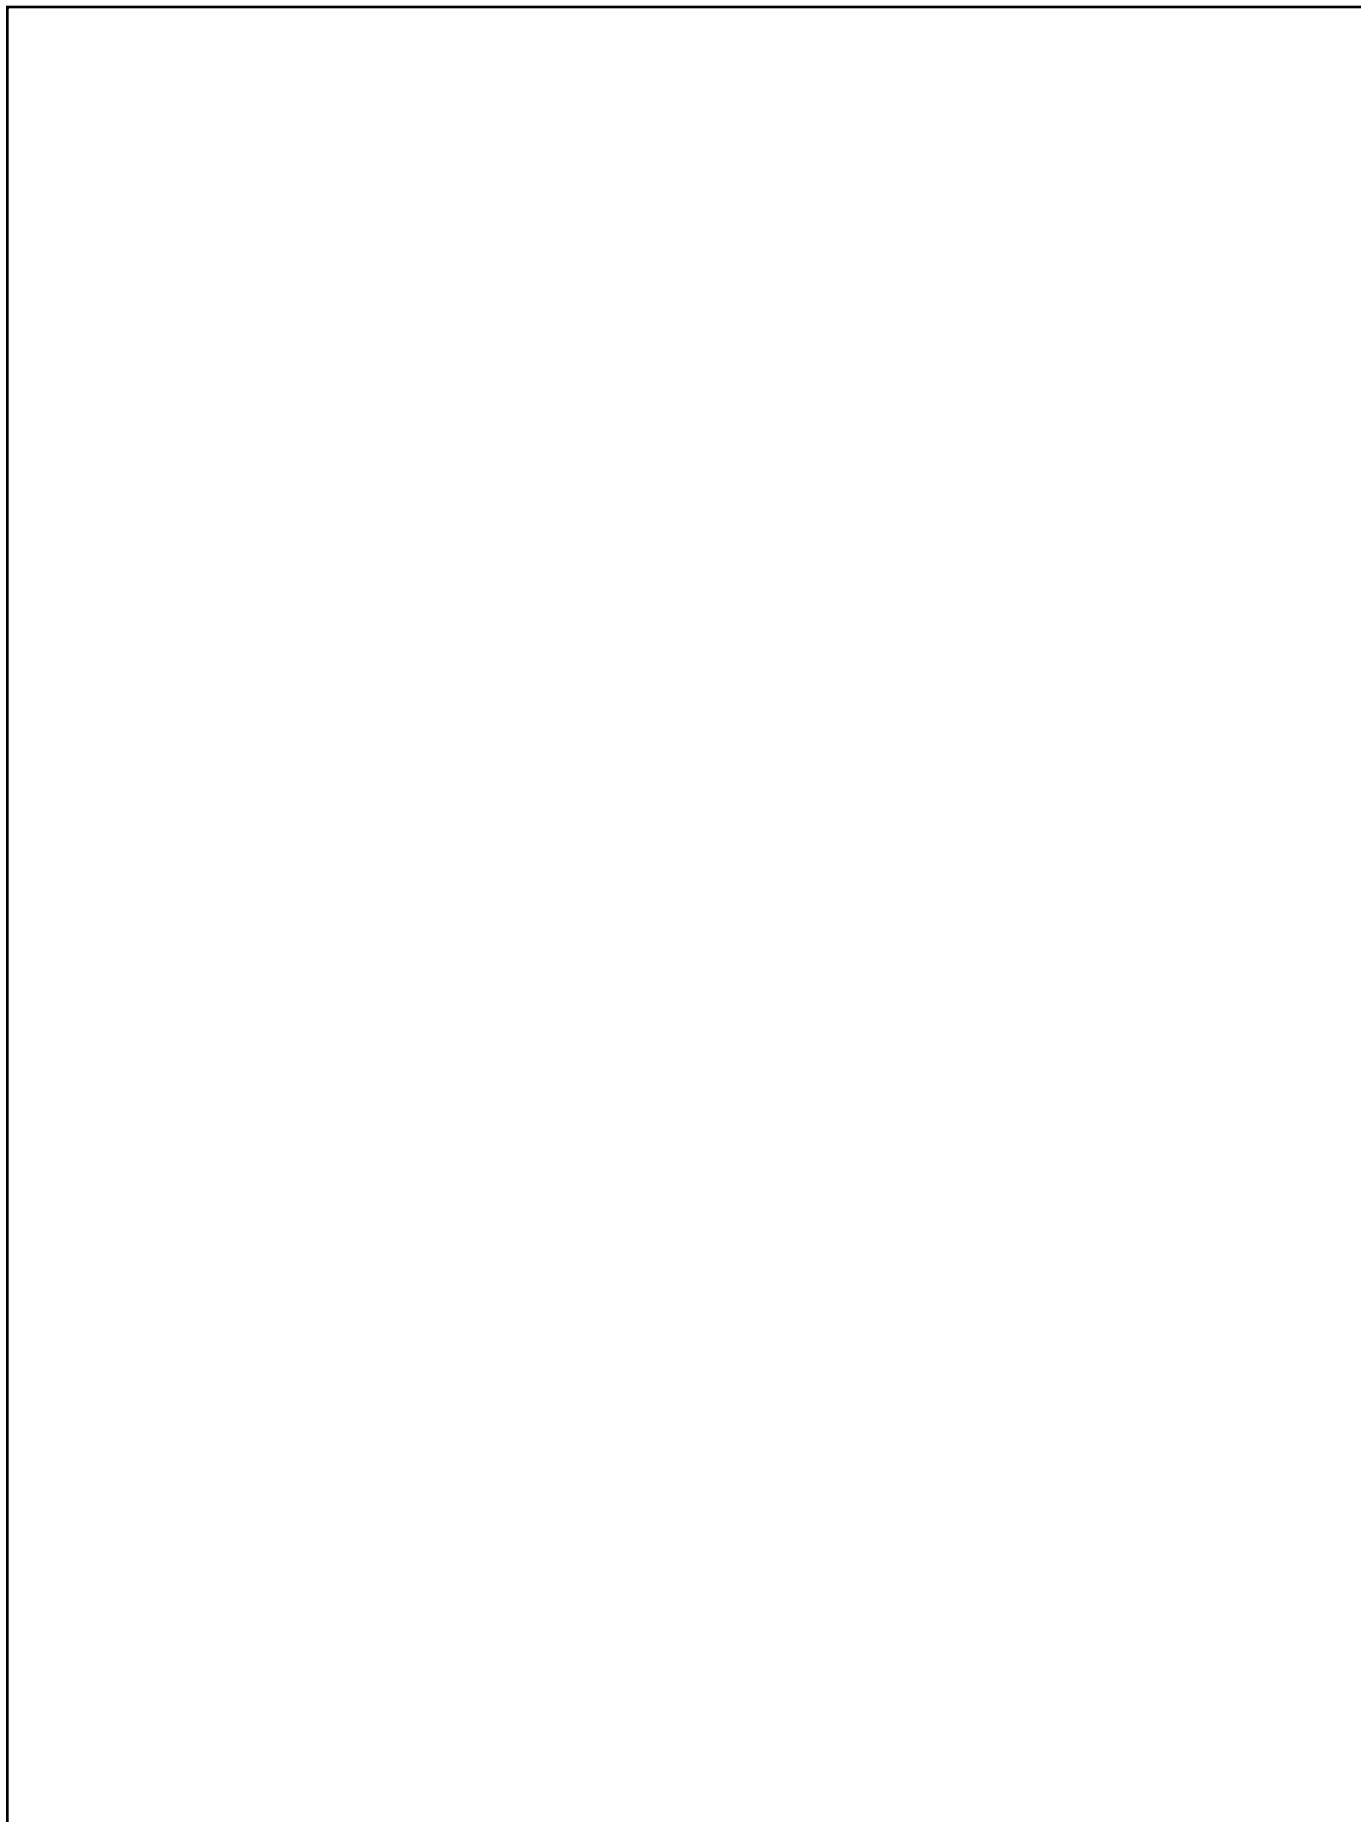



## *Log-Probability of the data given the model (marginal likelihood)*

Use this value for Bayes factor calculations:

$BF = \text{Exp}[\ln(\text{Prob}(D | \text{thisModel})) - \ln(\text{Prob}(D | \text{otherModel}))]$

or as  $LBF = 2 (\ln(\text{Prob}(D | \text{thisModel})) - \ln(\text{Prob}(D | \text{otherModel})))$

shows the support for thisModel]

| Method                    | $\ln(\text{Prob}(D   \text{Model}))$ | Notes |
|---------------------------|--------------------------------------|-------|
| Thermodynamic integration | -2660.566050                         | (1a)  |
|                           | -2658.266866                         | (1b)  |
| Harmonic mean             | -2517.504887                         | (2)   |

(1a, 1b and 2) is an approximation to the marginal likelihood, make sure the program run long enough!

(1a, 1b) and (2) should give a similar result, (2) is considered more

crude than (1), but (1) needs heating with several well-spaced chains,

(1b) is using a Bezier-curve to get better approximations for runs with low number

of heated chains

*Acceptance ratios for all parameters and the genealogies*

| Parameter             | Accepted changes | Ratio   |
|-----------------------|------------------|---------|
| $\Theta_1$            | 624973/624973    | 1.00000 |
| $\Theta_2$            | 626521/626521    | 1.00000 |
| $\Theta_3$            | 625271/625271    | 1.00000 |
| $M_{1 \rightarrow 2}$ | 623554/623554    | 1.00000 |
| $M_{1 \rightarrow 3}$ | 625061/625061    | 1.00000 |
| $M_{2 \rightarrow 3}$ | 624369/624369    | 1.00000 |
| Genealogies           | 491264/2501306   | 0.19640 |

## *MCMC-Autocorrelation and Effective MCMC Sample Size*

| Parameter             | Autocorrelation | Effective Sample Size |
|-----------------------|-----------------|-----------------------|
| $\Theta_1$            | 0.40862         | 20991.32              |
| $\Theta_2$            | 0.00082         | 49917.72              |
| $\Theta_3$            | 0.00272         | 49728.94              |
| $M_{1 \rightarrow 2}$ | 0.47700         | 17704.76              |
| $M_{1 \rightarrow 3}$ | 0.47190         | 17939.59              |
| $M_{2 \rightarrow 3}$ | 0.50422         | 16479.62              |
| Ln[Prob(DIG)]         | 0.54818         | 14591.84              |

## *Potential Problems*

This section reports potential problems with your run, but such reporting is often not very accurate. With many parameters in a multilocus analysis, it is very common that some parameters for some loci will not be very informative, triggering suggestions (for example to increase the prior range) that are not sensible. This suggestion tool will improve with time, therefore do not blindly follow its suggestions. If some parameters are flagged, inspect the tables carefully and judge whether an action is required. For example, if you run a Bayesian inference with sequence data, for macroscopic species there is rarely the need to increase the prior for Theta beyond 0.1; but if you use microsatellites it is rather common that your prior distribution for Theta should have a range from 0.0 to 100 or more. With many populations ( $>3$ ) it is also very common that some migration routes are estimated poorly because the data contains little or no information for that route. Increasing the range will not help in such situations, reducing number of parameters may help in such situations.

No warning was recorded during the run

# Example: sequence data set wit two loci [simula

MIGRATION RATE AND POPULATION SIZE ESTIMATION  
 using the coalescent and maximum likelihood or Bayesian inference  
 Migrate-n version 3.2.16 [1920]  
 Compiled for a SYMMETRIC MULTIPROCESSORS  
 Program started at Thu Jan 31 23:00:16 2013  
 Program finished at Fri Feb 1 00:58:35 2013

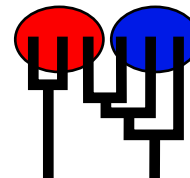

## Options

Datatype: DNA sequence data

Inheritance scalers in use for Thetas: 1.00

[Each Theta uses the (true) inheritance scalar of the first locus as a reference]

Random number seed: (with internal timer) 599348375

Start parameters:

Theta values were generated from the FST-calculation

M values were generated from the FST-calculation

Connection type matrix:

where m = average (average over a group of Thetas or M,  
 s = symmetric M, S = symmetric 4Nm, 0 = zero, and not estimated,  
 \* = free to vary, Thetas are on diagonal

| Population | 1 | 2 | 3 |
|------------|---|---|---|
| 1 BAJA     | * | 0 | 0 |
| 2 MIDR     | * | * | 0 |
| 3 MAIN     | * | * | * |

Order of parameters:

|   |                       |             |
|---|-----------------------|-------------|
| 1 | $\Theta_1$            | <displayed> |
| 2 | $\Theta_2$            | <displayed> |
| 3 | $\Theta_3$            | <displayed> |
| 6 | $M_{1 \rightarrow 2}$ | <displayed> |
| 8 | $M_{1 \rightarrow 3}$ | <displayed> |

```

9          M 2->3          <displayed>

Mutation rate among loci:          Mutation rate is constant

Analysis strategy:          Bayesian inference

Proposal distributions for parameter
Parameter          Proposal
Theta          Slice sampling
M          Slice sampling

Prior distribution for parameter
Parameter    Prior    Minimum    Mean*    Maximum    Delta    Bins
Theta    Uniform    0.000000    50.000000    100.000000    10.000000    1500
M    Uniform    0.000000    37500.000000    75000.000000    7500.000000    1500

Markov chain settings:          Long chain
Number of chains          1
  Recorded steps [a]          50000
  Increment (record every x step [b])          100
  Number of concurrent chains (replicates) [c]          1
  Visited (sampled) parameter values [a*b*c]          5000000
  Number of discard trees per chain (burn-in)          2500000

Multiple Markov chains:
  Static heating scheme          20 chains with temperatures
2.40    2.10    2.00    1.95    1.80    1.65    1.50    1.40    1.25    1.10    1.00
          Swapping interval is 1

Print options:
  Data file:          MRO_NGulf_direct.seq
  Output file:          MRO_NGulf_Direct2_run1
  Posterior distribution raw histogram file:          bayesfile
  Print data:          No
  Print genealogies [only some for some data type]:          None
  
```

## *Data summary*

Datatype: Sequence data

Number of loci: 1

| Population               | Locus | Gene copies |
|--------------------------|-------|-------------|
| 1 BAJA                   | 1     | 30          |
| 2 MIDR                   | 1     | 30          |
| 3 MAIN                   | 1     | 30          |
| Total of all populations | 1     | 90          |

## *Bayesian Analysis: Posterior distribution table*

| Locus | Parameter             | 2.5%    | 25.0%   | Mode    | 75.0%    | 97.5%    | Median   | Mean     |
|-------|-----------------------|---------|---------|---------|----------|----------|----------|----------|
| 1     | $\Theta_1$            | 0.00000 | 0.00000 | 0.03333 | 0.53333  | 1.40000  | 0.56667  | 0.00748  |
| 1     | $\Theta_2$            | 0.00000 | 0.00000 | 0.03333 | 4.73333  | 29.73333 | 49.70000 | 49.80238 |
| 1     | $\Theta_3$            | 1.00000 | 6.60000 | 8.90000 | 11.26667 | 43.80000 | 49.76667 | 49.90507 |
| 1     | $M_{1 \rightarrow 2}$ | 4250.0  | 7000.0  | 8775.0  | 11000.0  | 17400.0  | 9725.0   | 10251.9  |
| 1     | $M_{1 \rightarrow 3}$ | 2950.0  | 10200.0 | 20975.0 | 32200.0  | 64450.0  | 27475.0  | 30287.4  |
| 1     | $M_{2 \rightarrow 3}$ | 14950.0 | 32600.0 | 45475.0 | 57850.0  | 75000.0  | 44625.0  | 44230.9  |



*Bayesian Analysis: Posterior distribution over all loci*

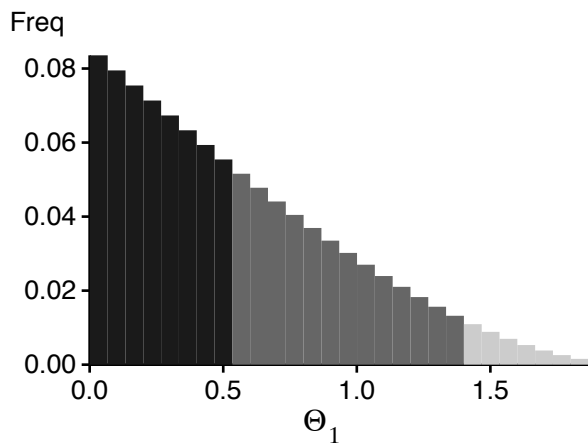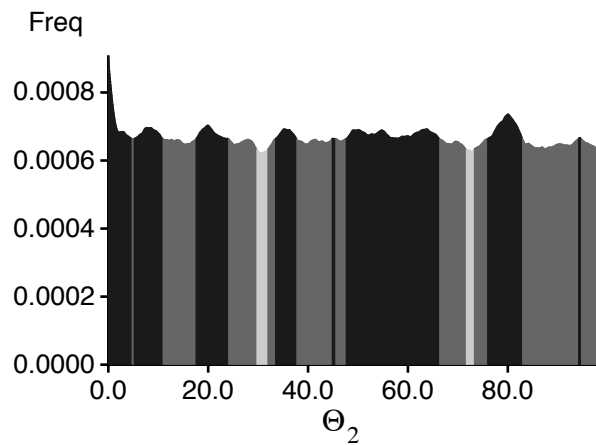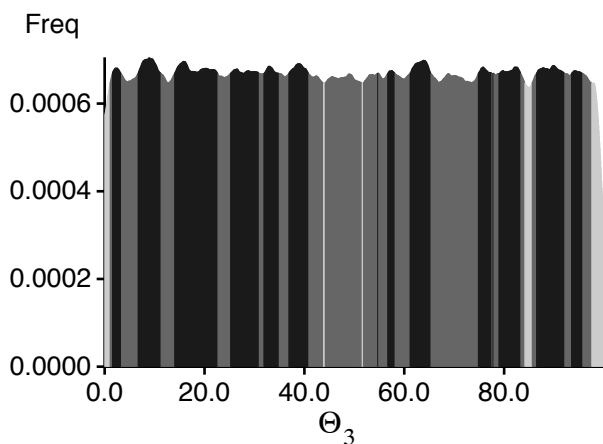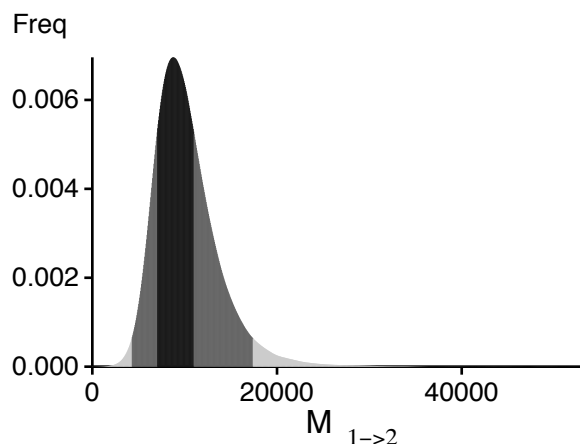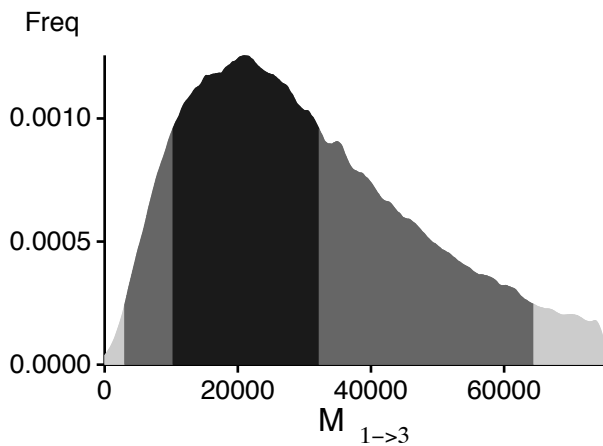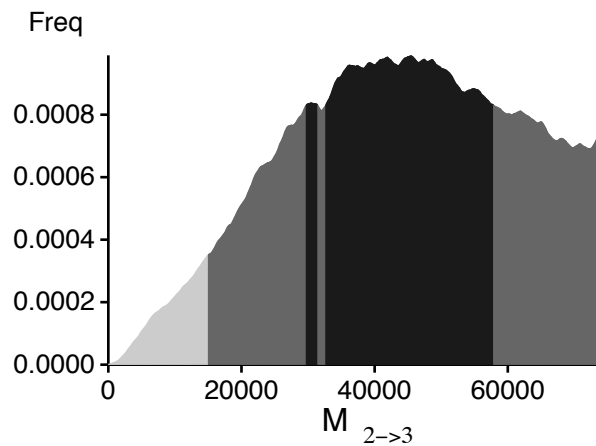



## *Log-Probability of the data given the model (marginal likelihood)*

Use this value for Bayes factor calculations:

$BF = \text{Exp}[\ln(\text{Prob}(D | \text{thisModel})) - \ln(\text{Prob}(D | \text{otherModel}))]$

or as  $LBF = 2 (\ln(\text{Prob}(D | \text{thisModel})) - \ln(\text{Prob}(D | \text{otherModel})))$

shows the support for thisModel]

| Method                    | $\ln(\text{Prob}(D   \text{Model}))$ | Notes |
|---------------------------|--------------------------------------|-------|
| Thermodynamic integration | -2660.905427                         | (1a)  |
|                           | -2658.464366                         | (1b)  |
| Harmonic mean             | -2515.794262                         | (2)   |

(1a, 1b and 2) is an approximation to the marginal likelihood, make sure the program run long enough!

(1a, 1b) and (2) should give a similar result, (2) is considered more

crude than (1), but (1) needs heating with several well-spaced chains,

(1b) is using a Bezier-curve to get better approximations for runs with low number

of heated chains

*Acceptance ratios for all parameters and the genealogies*

| Parameter             | Accepted changes | Ratio   |
|-----------------------|------------------|---------|
| $\Theta_1$            | 625435/625435    | 1.00000 |
| $\Theta_2$            | 624793/624793    | 1.00000 |
| $\Theta_3$            | 625019/625019    | 1.00000 |
| $M_{1 \rightarrow 2}$ | 625290/625290    | 1.00000 |
| $M_{1 \rightarrow 3}$ | 624017/624017    | 1.00000 |
| $M_{2 \rightarrow 3}$ | 626584/626584    | 1.00000 |
| Genealogies           | 492370/2499774   | 0.19697 |

## *MCMC-Autocorrelation and Effective MCMC Sample Size*

| Parameter             | Autocorrelation | Effective Sample Size |
|-----------------------|-----------------|-----------------------|
| $\Theta_1$            | 0.38129         | 22395.87              |
| $\Theta_2$            | 0.02018         | 48021.49              |
| $\Theta_3$            | -0.00076        | 50076.32              |
| $M_{1 \rightarrow 2}$ | 0.47159         | 17953.89              |
| $M_{1 \rightarrow 3}$ | 0.47816         | 17651.48              |
| $M_{2 \rightarrow 3}$ | 0.50152         | 16599.39              |
| Ln[Prob(DIG)]         | 0.53923         | 14967.64              |

## *Potential Problems*

This section reports potential problems with your run, but such reporting is often not very accurate. With many parameters in a multilocus analysis, it is very common that some parameters for some loci will not be very informative, triggering suggestions (for example to increase the prior range) that are not sensible. This suggestion tool will improve with time, therefore do not blindly follow its suggestions. If some parameters are flagged, inspect the tables carefully and judge whether an action is required. For example, if you run a Bayesian inference with sequence data, for macroscopic species there is rarely the need to increase the prior for Theta beyond 0.1; but if you use microsatellites it is rather common that your prior distribution for Theta should have a range from 0.0 to 100 or more. With many populations ( $>3$ ) it is also very common that some migration routes are estimated poorly because the data contains little or no information for that route. Increasing the range will not help in such situations, reducing number of parameters may help in such situations.

No warning was recorded during the run
