# Supplementary material for: Asymmetric connectivity of spawning aggregations of a commercially important marine fish using a multidisciplinary approach
Source: PubMed Central journal article supplement (PMC4137664; doi:10.7717/peerj.511), 2014-08-07
Supplement: peerj-02-511-s010.pdf [file peerj-02-511-s010.pdf]

# Example: sequence data set wit two loci [simula

MIGRATION RATE AND POPULATION SIZE ESTIMATION  
 using the coalescent and maximum likelihood or Bayesian inference  
 Migrate-n version 3.2.6 [1776]  
 Program started at Sun Jan 27 15:05:54 2013  
 Program finished at Sun Jan 27 16:28:46 2013

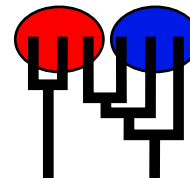

## Options

Datatype: DNA sequence data

Inheritance scalers in use for Thetas: 1.00

[Each Theta uses the (true) ineritance scalar of the first locus as a reference]

Random number seed: (with internal timer) 1213855653

Start parameters:

Theta values were generated from the FST-calculation

M values were generated from the FST-calculation

Connection type matrix:

where m = average (average over a group of Thetas or M,  
 s = symmetric M, S = symmetric 4Nm, 0 = zero, and not estimated,  
 \* = free to vary, Thetas are on diagonal

| Population | 1 | 2 | 3 |
|------------|---|---|---|
| 1 BAJA     | * | * | * |
| 2 MIDR     | 0 | * | * |
| 3 MAIN     | 0 | 0 | * |

Order of parameters:

- 1  $\Theta_1$  <displayed>
- 2  $\Theta_2$  <displayed>
- 3  $\Theta_3$  <displayed>
- 4  $M_{2 \rightarrow 1}$  <displayed>
- 5  $M_{3 \rightarrow 1}$  <displayed>
- 7  $M_{3 \rightarrow 2}$  <displayed>

Mutation rate among loci:

Mutation rate is constant

Analysis strategy:

Bayesian inference

Proposal distributions for parameter

| Parameter | Proposal       |
|-----------|----------------|
| Theta     | Slice sampling |
| M         | Slice sampling |

Prior distribution for parameter

| Parameter | Prior   | Minimum  | Mean*        | Maximum      | Delta       | Bins |
|-----------|---------|----------|--------------|--------------|-------------|------|
| Theta     | Uniform | 0.000000 | 50.000000    | 100.000000   | 10.000000   | 1500 |
| M         | Uniform | 0.000000 | 37500.000000 | 75000.000000 | 7500.000000 | 1500 |

Markov chain settings:

Long chain

|                                              |         |
|----------------------------------------------|---------|
| Number of chains                             | 1       |
| Recorded steps [a]                           | 50000   |
| Increment (record every x step [b])          | 100     |
| Number of concurrent chains (replicates) [c] | 1       |
| Visited (sampled) parameter values [a*b*c]   | 5000000 |
| Number of discard trees per chain (burn-in)  | 2500000 |

Multiple Markov chains:

Static heating scheme

20 chains with temperatures

|      |      |      |      |      |      |      |      |      |      |      |
|------|------|------|------|------|------|------|------|------|------|------|
| 2.40 | 2.10 | 2.00 | 1.95 | 1.80 | 1.65 | 1.50 | 1.40 | 1.25 | 1.10 | 1.00 |
|------|------|------|------|------|------|------|------|------|------|------|

Swapping interval is 1

Print options:

|                                                   |                        |
|---------------------------------------------------|------------------------|
| Data file:                                        | MRO_NGulf_direct.seq   |
| Output file:                                      | MRO_NGulf_Direct1_run1 |
| Posterior distribution raw histogram file:        | bayesfile              |
| Print data:                                       | No                     |
| Print genealogies [only some for some data type]: | None                   |

## *Data summary*

Datatype: Sequence data

Number of loci: 1

| Population               | Locus | Gene copies |
|--------------------------|-------|-------------|
| 1 BAJA                   | 1     | 30          |
| 2 MIDR                   | 1     | 30          |
| 3 MAIN                   | 1     | 30          |
| Total of all populations | 1     | 90          |

## *Bayesian Analysis: Posterior distribution table*

| Locus | Parameter             | 2.5%     | 25.0%    | Mode     | 75.0%    | 97.5%    | Median   | Mean     |
|-------|-----------------------|----------|----------|----------|----------|----------|----------|----------|
| 1     | $\Theta_1$            | 18.86667 | 69.20000 | 71.56667 | 73.20000 | 92.66666 | 50.03333 | 50.09443 |
| 1     | $\Theta_2$            | 31.00000 | 46.53333 | 48.83333 | 50.46667 | 86.33334 | 49.83333 | 50.04533 |
| 1     | $\Theta_3$            | 0.00000  | 0.00000  | 0.03333  | 0.53333  | 1.40000  | 0.56667  | 0.00760  |
| 1     | $M_{2 \rightarrow 1}$ | 17550.0  | 35750.0  | 48825.0  | 60300.0  | 75000.0  | 46575.0  | 45951.8  |
| 1     | $M_{3 \rightarrow 1}$ | 2250.0   | 10350.0  | 18075.0  | 31050.0  | 61600.0  | 26125.0  | 28825.8  |
| 1     | $M_{3 \rightarrow 2}$ | 4300.0   | 7000.0   | 9025.0   | 11300.0  | 18100.0  | 10025.0  | 10559.0  |

## *Bayesian Analysis: Posterior distribution over all loci*

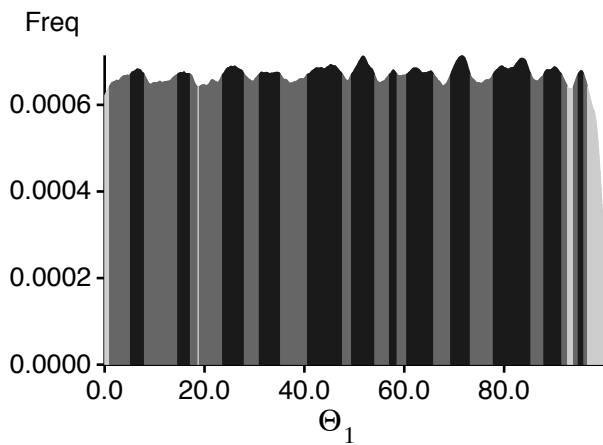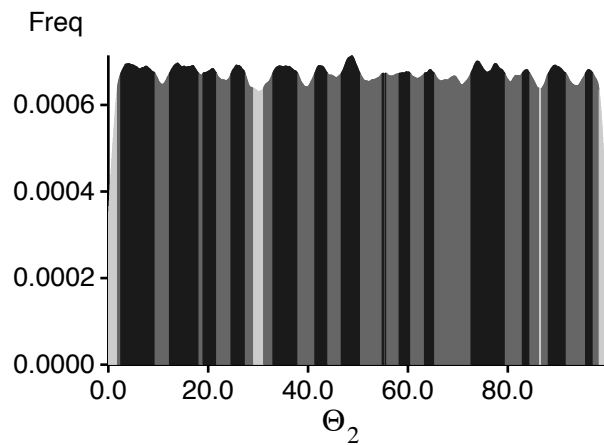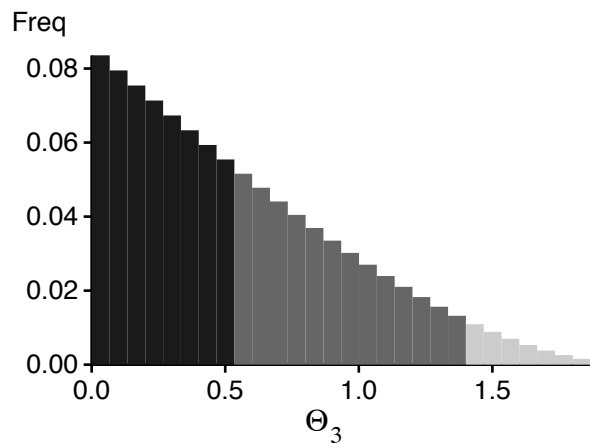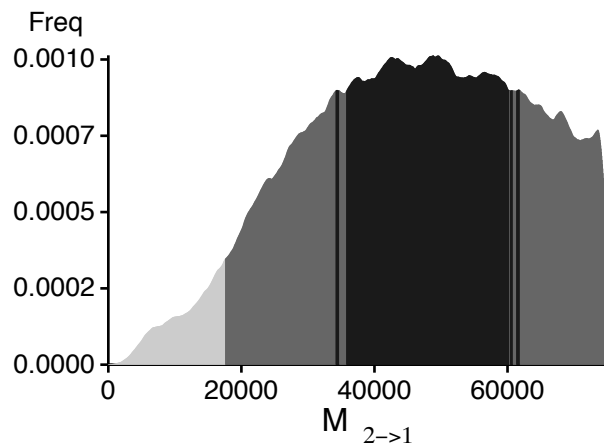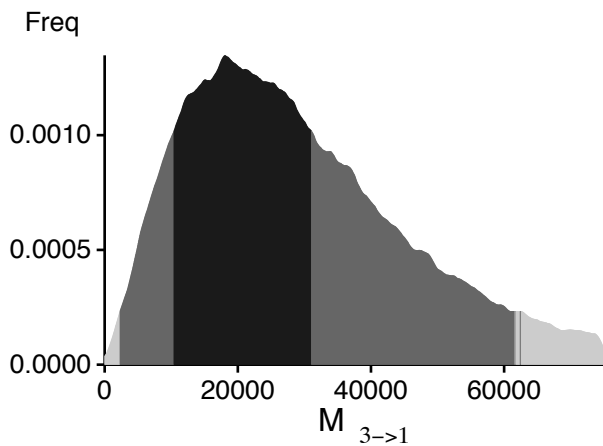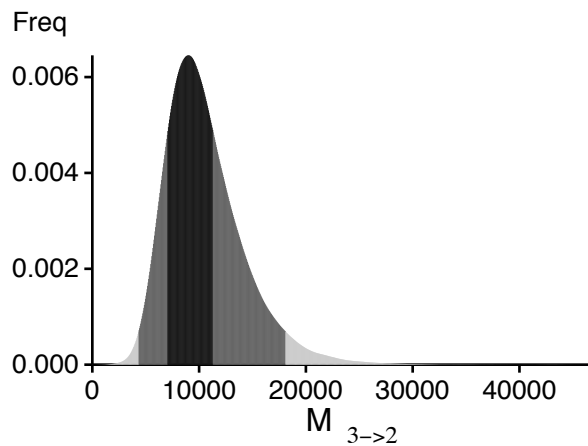

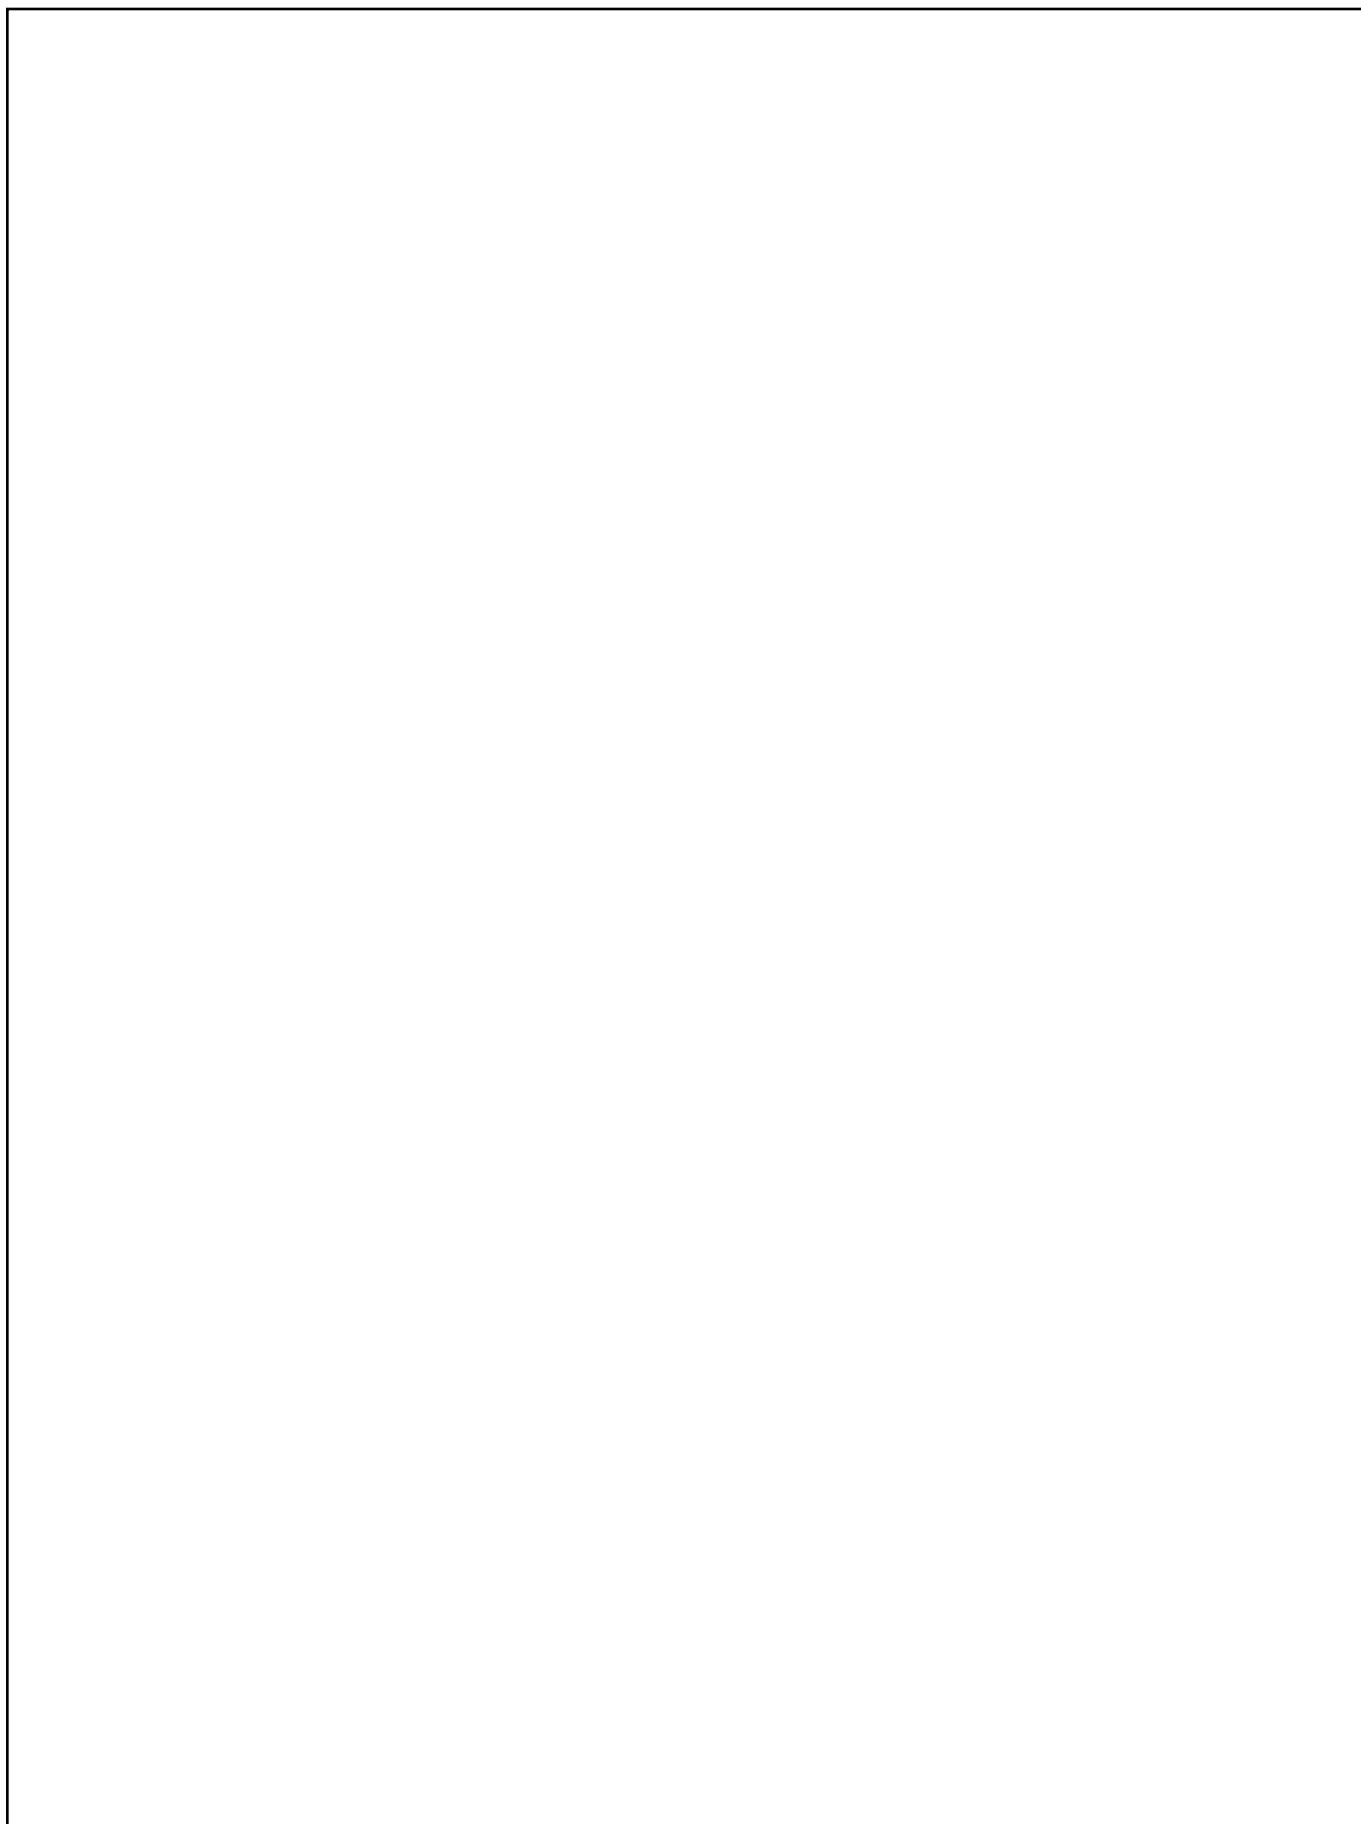

## *Log-Probability of the data given the model (marginal likelihood)*

Use this value for Bayes factor calculations:

$BF = \text{Exp}[\ln(\text{Prob}(D | \text{thisModel})) - \ln(\text{Prob}(D | \text{otherModel}))]$

or as  $LBF = 2 (\ln(\text{Prob}(D | \text{thisModel})) - \ln(\text{Prob}(D | \text{otherModel})))$

shows the support for thisModel]

| Method                    | $\ln(\text{Prob}(D   \text{Model}))$ | Notes |
|---------------------------|--------------------------------------|-------|
| Thermodynamic integration | -3095.438191                         | (1a)  |
|                           | -2974.327042                         | (1b)  |
| Harmonic mean             | -2529.205774                         | (2)   |

(1a, 1b and 2) is an approximation to the marginal likelihood, make sure the program run long enough!

(1a, 1b) and (2) should give a similar result, (2) is considered more

crude than (1), but (1) needs heating with several well-spaced chains,

(1b) is using a Bezier-curve to get better approximations for runs with low number

of heated chains

*Acceptance ratios for all parameters and the genealogies*

| Parameter             | Accepted changes | Ratio   |
|-----------------------|------------------|---------|
| $\Theta_1$            | 625510/625510    | 1.00000 |
| $\Theta_2$            | 625293/625293    | 1.00000 |
| $\Theta_3$            | 623809/623809    | 1.00000 |
| $M_{2 \rightarrow 1}$ | 625566/625566    | 1.00000 |
| $M_{3 \rightarrow 1}$ | 623679/623679    | 1.00000 |
| $M_{3 \rightarrow 2}$ | 626240/626240    | 1.00000 |
| Genealogies           | 488947/2500048   | 0.19558 |



## *MCMC-Autocorrelation and Effective MCMC Sample Size*

| Parameter             | Autocorrelation | Effective Sample Size |
|-----------------------|-----------------|-----------------------|
| $\Theta_1$            | -0.00348        | 50349.57              |
| $\Theta_2$            | 0.00546         | 49457.23              |
| $\Theta_3$            | 0.37793         | 22572.61              |
| $M_{2 \rightarrow 1}$ | 0.49144         | 17049.07              |
| $M_{3 \rightarrow 1}$ | 0.45454         | 18750.11              |
| $M_{3 \rightarrow 2}$ | 0.44707         | 19105.27              |
| Ln[Prob(DIG)]         | 0.52614         | 15524.72              |

# Example: sequence data set wit two loci [simula

MIGRATION RATE AND POPULATION SIZE ESTIMATION  
 using the coalescent and maximum likelihood or Bayesian inference  
 Migrate-n version 3.2.6 [1776]  
 Program started at Tue Jan 29 09:30:51 2013  
 Program finished at Tue Jan 29 10:54:17 2013



## Options

Datatype: DNA sequence data

Inheritance scalers in use for Thetas: 1.00

[Each Theta uses the (true) ineritance scalar of the first locus as a reference]

Random number seed: (with internal timer) 597500213

Start parameters:

Theta values were generated from the FST-calculation

M values were generated from the FST-calculation

Connection type matrix:

where m = average (average over a group of Thetas or M,  
 s = symmetric M, S = symmetric 4Nm, 0 = zero, and not estimated,  
 \* = free to vary, Thetas are on diagonal

| Population | 1 | 2 | 3 |
|------------|---|---|---|
| 1 BAJA     | * | * | * |
| 2 MIDR     | 0 | * | * |
| 3 MAIN     | 0 | 0 | * |

Order of parameters:

|   |                       |             |
|---|-----------------------|-------------|
| 1 | $\Theta_1$            | <displayed> |
| 2 | $\Theta_2$            | <displayed> |
| 3 | $\Theta_3$            | <displayed> |
| 4 | $M_{2 \rightarrow 1}$ | <displayed> |
| 5 | $M_{3 \rightarrow 1}$ | <displayed> |
| 7 | $M_{3 \rightarrow 2}$ | <displayed> |

Mutation rate among loci:

Mutation rate is constant

Analysis strategy:

Bayesian inference

Proposal distributions for parameter

| Parameter | Proposal       |
|-----------|----------------|
| Theta     | Slice sampling |
| M         | Slice sampling |

Prior distribution for parameter

| Parameter | Prior   | Minimum  | Mean*        | Maximum      | Delta       | Bins |
|-----------|---------|----------|--------------|--------------|-------------|------|
| Theta     | Uniform | 0.000000 | 50.000000    | 100.000000   | 10.000000   | 1500 |
| M         | Uniform | 0.000000 | 37500.000000 | 75000.000000 | 7500.000000 | 1500 |

Markov chain settings:

Long chain

|                                              |         |
|----------------------------------------------|---------|
| Number of chains                             | 1       |
| Recorded steps [a]                           | 50000   |
| Increment (record every x step [b])          | 100     |
| Number of concurrent chains (replicates) [c] | 1       |
| Visited (sampled) parameter values [a*b*c]   | 5000000 |
| Number of discard trees per chain (burn-in)  | 2500000 |

Multiple Markov chains:

Static heating scheme

20 chains with temperatures

|      |      |      |      |      |      |      |      |      |      |      |
|------|------|------|------|------|------|------|------|------|------|------|
| 2.40 | 2.10 | 2.00 | 1.95 | 1.80 | 1.65 | 1.50 | 1.40 | 1.25 | 1.10 | 1.00 |
|------|------|------|------|------|------|------|------|------|------|------|

Swapping interval is 1

Print options:

|                                                   |                        |
|---------------------------------------------------|------------------------|
| Data file:                                        | MRO_NGulf_direct.seq   |
| Output file:                                      | MRO_NGulf_Direct1_run2 |
| Posterior distribution raw histogram file:        | bayesfile              |
| Print data:                                       | No                     |
| Print genealogies [only some for some data type]: | None                   |

## *Data summary*

Datatype: Sequence data

Number of loci: 1

| Population               | Locus | Gene copies |
|--------------------------|-------|-------------|
| 1 BAJA                   | 1     | 30          |
| 2 MIDR                   | 1     | 30          |
| 3 MAIN                   | 1     | 30          |
| Total of all populations | 1     | 90          |

## *Bayesian Analysis: Posterior distribution table*

| Locus | Parameter             | 2.5%    | 25.0%   | Mode     | 75.0%    | 97.5%    | Median   | Mean     |
|-------|-----------------------|---------|---------|----------|----------|----------|----------|----------|
| 1     | $\Theta_1$            | 0.80000 | 9.53333 | 11.56667 | 16.60000 | 39.73333 | 50.10000 | 49.93845 |
| 1     | $\Theta_2$            | 5.00000 | 6.60000 | 8.83333  | 11.40000 | 22.86667 | 49.56667 | 49.90416 |
| 1     | $\Theta_3$            | 0.00000 | 0.00000 | 0.03333  | 0.53333  | 1.40000  | 0.56667  | 0.00759  |
| 1     | $M_{2 \rightarrow 1}$ | 19550.0 | 37400.0 | 43275.0  | 58350.0  | 74750.0  | 47275.0  | 46981.7  |
| 1     | $M_{3 \rightarrow 1}$ | 3200.0  | 11750.0 | 23925.0  | 35300.0  | 66150.0  | 29025.0  | 31721.9  |
| 1     | $M_{3 \rightarrow 2}$ | 4350.0  | 7100.0  | 9125.0   | 11400.0  | 18450.0  | 10075.0  | 10685.0  |

### Bayesian Analysis: Posterior distribution over all loci

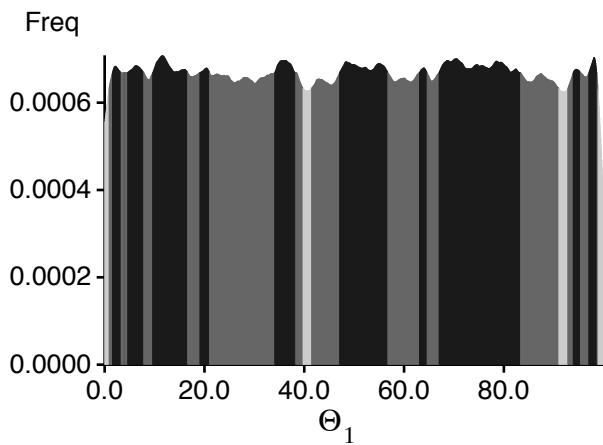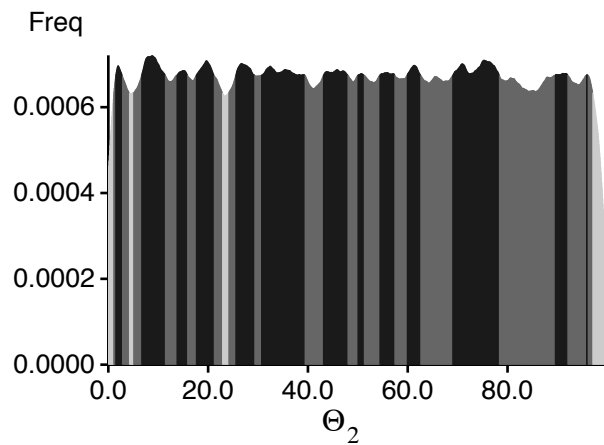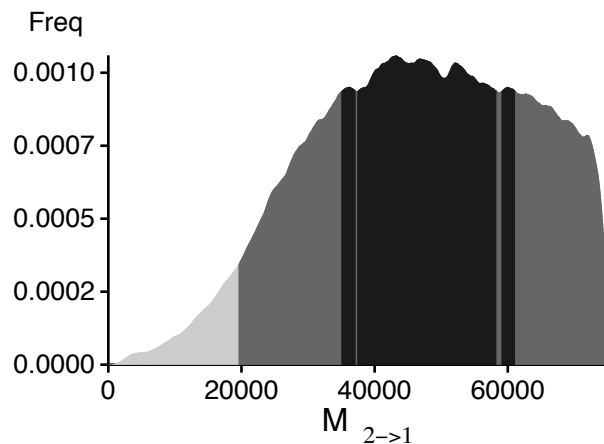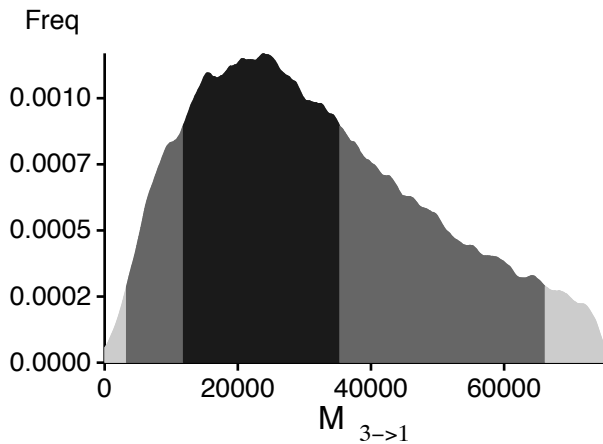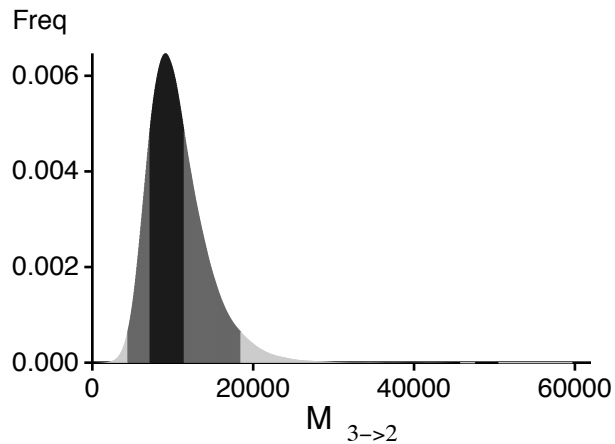

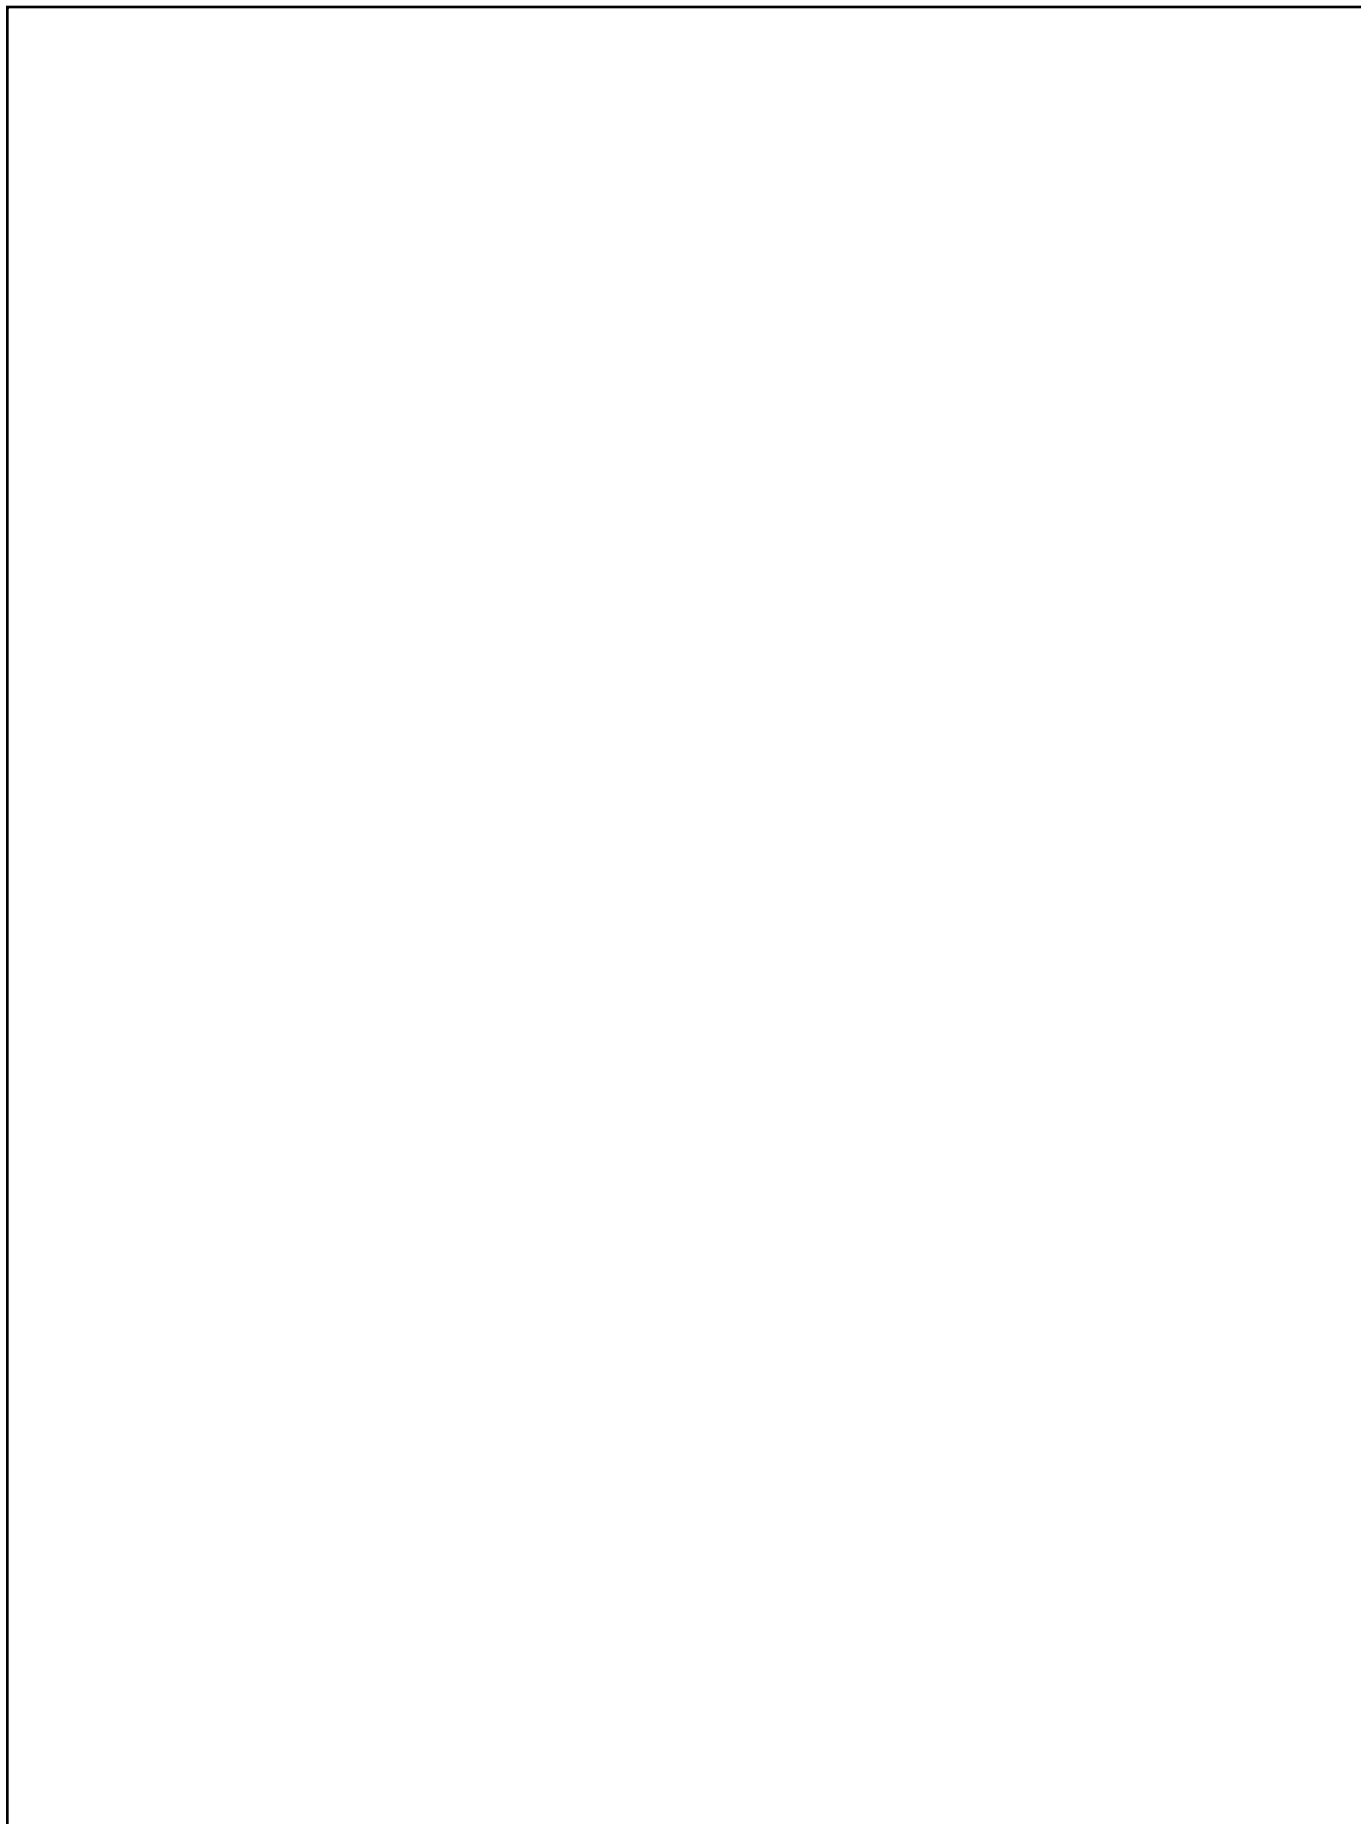

## *Log-Probability of the data given the model (marginal likelihood)*

Use this value for Bayes factor calculations:

$$BF = \text{Exp}[\ln(\text{Prob}(D | \text{thisModel})) - \ln(\text{Prob}(D | \text{otherModel}))]$$

$$\text{or as LBF} = 2 (\ln(\text{Prob}(D | \text{thisModel})) - \ln(\text{Prob}(D | \text{otherModel})))$$

shows the support for thisModel]

| Method                    | $\ln(\text{Prob}(D   \text{Model}))$ | Notes |
|---------------------------|--------------------------------------|-------|
| Thermodynamic integration | -3097.747293                         | (1a)  |
|                           | -2976.408268                         | (1b)  |
| Harmonic mean             | -2550.572856                         | (2)   |

(1a, 1b and 2) is an approximation to the marginal likelihood, make sure the program run long enough!

(1a, 1b) and (2) should give a similar result, (2) is considered more

crude than (1), but (1) needs heating with several well-spaced chains,

(1b) is using a Bezier-curve to get better approximations for runs with low number of heated chains



*Acceptance ratios for all parameters and the genealogies*

| Parameter             | Accepted changes | Ratio   |
|-----------------------|------------------|---------|
| $\Theta_1$            | 625209/625209    | 1.00000 |
| $\Theta_2$            | 625116/625116    | 1.00000 |
| $\Theta_3$            | 625303/625303    | 1.00000 |
| $M_{2 \rightarrow 1}$ | 624999/624999    | 1.00000 |
| $M_{3 \rightarrow 1}$ | 624094/624094    | 1.00000 |
| $M_{3 \rightarrow 2}$ | 625270/625270    | 1.00000 |
| Genealogies           | 488739/2501165   | 0.19540 |

## *MCMC-Autocorrelation and Effective MCMC Sample Size*

| Parameter             | Autocorrelation | Effective Sample Size |
|-----------------------|-----------------|-----------------------|
| $\Theta_1$            | -0.00389        | 50390.38              |
| $\Theta_2$            | 0.01303         | 48713.73              |
| $\Theta_3$            | 0.36067         | 23493.21              |
| $M_{2 \rightarrow 1}$ | 0.42072         | 20386.82              |
| $M_{3 \rightarrow 1}$ | 0.47805         | 17656.85              |
| $M_{3 \rightarrow 2}$ | 0.47626         | 17738.80              |
| Ln[Prob(DIG)]         | 0.55010         | 14512.05              |

# Example: sequence data set wit two loci [simula

MIGRATION RATE AND POPULATION SIZE ESTIMATION  
 using the coalescent and maximum likelihood or Bayesian inference  
 Migrate-n version 3.2.6 [1776]  
 Program started at Tue Jan 29 15:29:48 2013  
 Program finished at Tue Jan 29 16:51:48 2013



## Options

Datatype: DNA sequence data

Inheritance scalers in use for Thetas: 1.00

[Each Theta uses the (true) ineritance scalar of the first locus as a reference]

Random number seed: (with internal timer) 266474721

Start parameters:

Theta values were generated from the FST-calculation

M values were generated from the FST-calculation

Connection type matrix:

where m = average (average over a group of Thetas or M,  
 s = symmetric M, S = symmetric 4Nm, 0 = zero, and not estimated,  
 \* = free to vary, Thetas are on diagonal

| Population | 1 | 2 | 3 |
|------------|---|---|---|
| 1 BAJA     | * | * | * |
| 2 MIDR     | 0 | * | * |
| 3 MAIN     | 0 | 0 | * |

Order of parameters:

- 1  $\Theta_1$  <displayed>
- 2  $\Theta_2$  <displayed>
- 3  $\Theta_3$  <displayed>
- 4  $M_{2 \rightarrow 1}$  <displayed>
- 5  $M_{3 \rightarrow 1}$  <displayed>
- 7  $M_{3 \rightarrow 2}$  <displayed>

Mutation rate among loci: Mutation rate is constant

Analysis strategy: Bayesian inference

Proposal distributions for parameter

| Parameter | Proposal       |
|-----------|----------------|
| Theta     | Slice sampling |
| M         | Slice sampling |

Prior distribution for parameter

| Parameter | Prior   | Minimum  | Mean*        | Maximum      | Delta       | Bins |
|-----------|---------|----------|--------------|--------------|-------------|------|
| Theta     | Uniform | 0.000000 | 50.000000    | 100.000000   | 10.000000   | 1500 |
| M         | Uniform | 0.000000 | 37500.000000 | 75000.000000 | 7500.000000 | 1500 |

Markov chain settings: Long chain

|                                              |         |
|----------------------------------------------|---------|
| Number of chains                             | 1       |
| Recorded steps [a]                           | 50000   |
| Increment (record every x step [b])          | 100     |
| Number of concurrent chains (replicates) [c] | 1       |
| Visited (sampled) parameter values [a*b*c]   | 5000000 |
| Number of discard trees per chain (burn-in)  | 2500000 |

Multiple Markov chains:

|                        |                             |      |      |      |      |      |      |      |      |      |
|------------------------|-----------------------------|------|------|------|------|------|------|------|------|------|
| Static heating scheme  | 20 chains with temperatures |      |      |      |      |      |      |      |      |      |
| 2.40                   | 2.10                        | 2.00 | 1.95 | 1.80 | 1.65 | 1.50 | 1.40 | 1.25 | 1.10 | 1.00 |
| Swapping interval is 1 |                             |      |      |      |      |      |      |      |      |      |

Print options:

|                                                   |                        |
|---------------------------------------------------|------------------------|
| Data file:                                        | MRO_NGulf_direct.seq   |
| Output file:                                      | MRO_NGulf_Direct1_run3 |
| Posterior distribution raw histogram file:        | bayesfile              |
| Print data:                                       | No                     |
| Print genealogies [only some for some data type]: | None                   |

## *Data summary*

Datatype: Sequence data

Number of loci: 1

| Population               | Locus | Gene copies |
|--------------------------|-------|-------------|
| 1 BAJA                   | 1     | 30          |
| 2 MIDR                   | 1     | 30          |
| 3 MAIN                   | 1     | 30          |
| Total of all populations | 1     | 90          |

## *Bayesian Analysis: Posterior distribution table*

| Locus | Parameter             | 2.5%     | 25.0%    | Mode     | 75.0%    | 97.5%    | Median   | Mean     |
|-------|-----------------------|----------|----------|----------|----------|----------|----------|----------|
| 1     | $\Theta_1$            | 24.20000 | 73.86667 | 76.83334 | 85.13333 | 92.33334 | 50.10000 | 50.18420 |
| 1     | $\Theta_2$            | 62.26667 | 77.06667 | 79.03333 | 81.26667 | 93.33334 | 49.83333 | 50.01832 |
| 1     | $\Theta_3$            | 0.00000  | 0.00000  | 0.03333  | 0.53333  | 1.40000  | 0.56667  | 0.00757  |
| 1     | $M_{2 \rightarrow 1}$ | 15100.0  | 31150.0  | 42225.0  | 57600.0  | 75000.0  | 45325.0  | 44848.9  |
| 1     | $M_{3 \rightarrow 1}$ | 1350.0   | 9850.0   | 16825.0  | 31650.0  | 61350.0  | 25925.0  | 28507.9  |
| 1     | $M_{3 \rightarrow 2}$ | 4550.0   | 7350.0   | 9225.0   | 11500.0  | 17700.0  | 10175.0  | 10638.9  |

## *Bayesian Analysis: Posterior distribution over all loci*

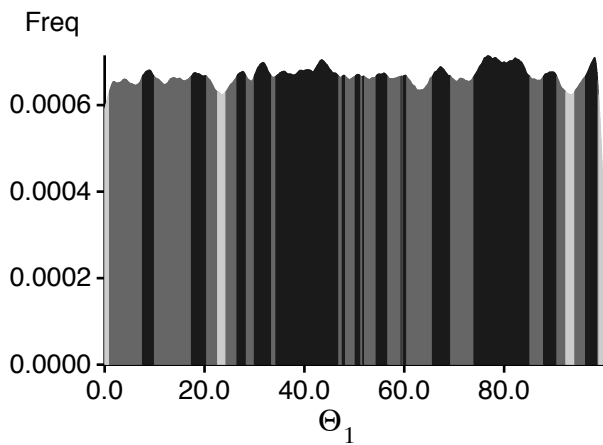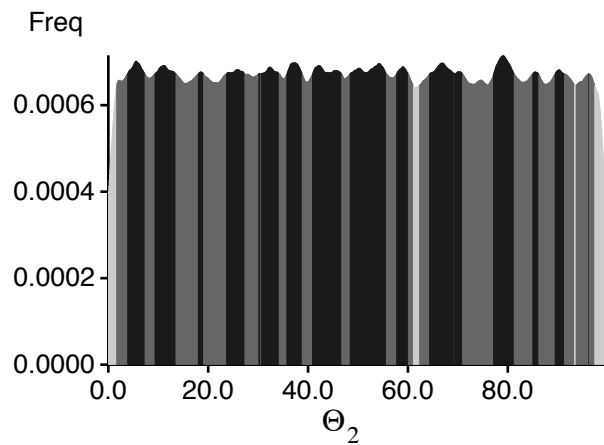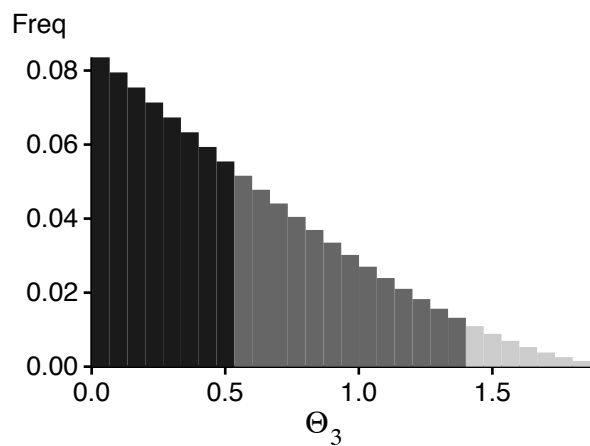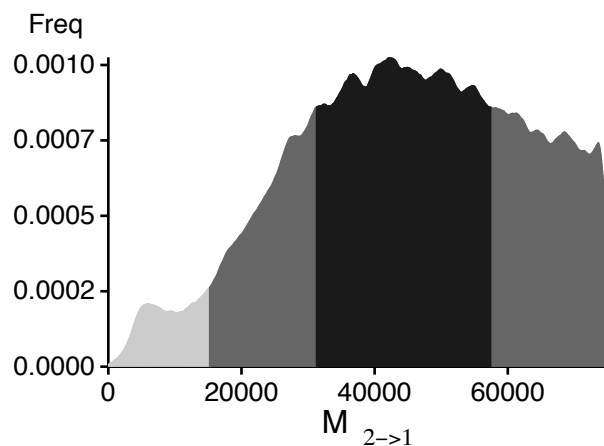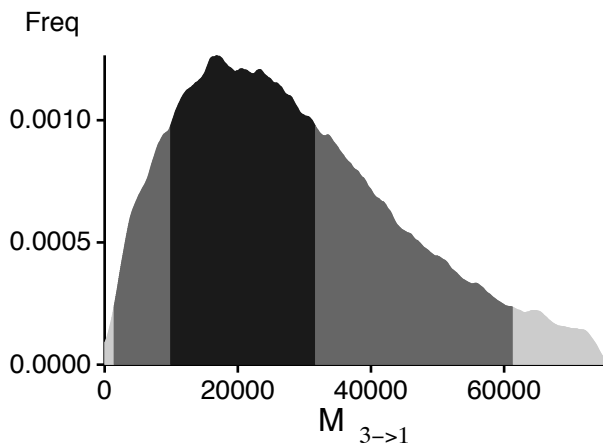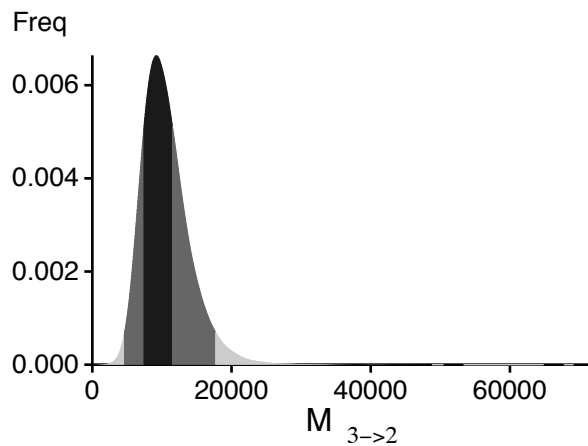





## *Log-Probability of the data given the model (marginal likelihood)*

Use this value for Bayes factor calculations:

$BF = \text{Exp}[\ln(\text{Prob}(D | \text{thisModel})) - \ln(\text{Prob}(D | \text{otherModel}))]$

or as  $LBF = 2 (\ln(\text{Prob}(D | \text{thisModel})) - \ln(\text{Prob}(D | \text{otherModel})))$

shows the support for thisModel]

| Method                    | $\ln(\text{Prob}(D   \text{Model}))$ | Notes |
|---------------------------|--------------------------------------|-------|
| Thermodynamic integration | -3098.731465                         | (1a)  |
|                           | -2977.257640                         | (1b)  |
| Harmonic mean             | -2516.958060                         | (2)   |

(1a, 1b and 2) is an approximation to the marginal likelihood, make sure the program run long enough!

(1a, 1b) and (2) should give a similar result, (2) is considered more

crude than (1), but (1) needs heating with several well-spaced chains,

(1b) is using a Bezier-curve to get better approximations for runs with low number

of heated chains

*Acceptance ratios for all parameters and the genealogies*

| Parameter             | Accepted changes | Ratio   |
|-----------------------|------------------|---------|
| $\Theta_1$            | 625623/625623    | 1.00000 |
| $\Theta_2$            | 624206/624206    | 1.00000 |
| $\Theta_3$            | 625802/625802    | 1.00000 |
| $M_{2 \rightarrow 1}$ | 625069/625069    | 1.00000 |
| $M_{3 \rightarrow 1}$ | 624934/624934    | 1.00000 |
| $M_{3 \rightarrow 2}$ | 624676/624676    | 1.00000 |
| Genealogies           | 488992/2499908   | 0.19560 |

## *MCMC-Autocorrelation and Effective MCMC Sample Size*

| Parameter             | Autocorrelation | Effective Sample Size |
|-----------------------|-----------------|-----------------------|
| $\Theta_1$            | 0.00873         | 49134.86              |
| $\Theta_2$            | 0.00044         | 49956.21              |
| $\Theta_3$            | 0.37825         | 22555.60              |
| $M_{2 \rightarrow 1}$ | 0.51426         | 16038.66              |
| $M_{3 \rightarrow 1}$ | 0.47824         | 17647.93              |
| $M_{3 \rightarrow 2}$ | 0.47263         | 17905.86              |
| Ln[Prob(DIG)]         | 0.52423         | 15606.92              |
